# Supplementary material for: N-acyl Amides from Neisseria meningitidis and Their Role in Sphingosine Receptor Signaling
Source: PubMed Central journal article supplement (PMC9762135; doi:10.1002/cbic.202200490), 2022-10-13
Supplement: NIHMS1852871-supplement-supinfo.pdf [file NIHMS1852871-supplement-supinfo.pdf]

GenBank Accession: SPY04274.1; Region 191-450

*Nm*NAT nucleotide sequence

ATGTCCCCCAGCCGTTTCAATCAAACGGGCCCCAAAATCGGCCTGAGCGTACGCCTTGCAGAAACC  
 CAAGCTGAAATCGAAGCCGCCCAAAGATTGCGCTATCAGGTTTTTGCCCAAGAGTTGGGGGCGGAA  
 ATCGAAAGCGATGACGGCCGTGATGTTCGATCCTTATGATGAGCATTGCCACCACCTGCTTGCCTTCG  
 ACGATGCAACCGGCCGAAGTTATCGGCTGCTACCGCCTGATTACCGAAGAAACCGCGAAAAAAGTCG  
 GCGGCTGGTACAGCGAGCATGAATTCGACCATGAGCCTTTGAAAGACATTCTGCCGCAAACCGTCG  
 AACTCGGTGCGCCTGTACCCACCCGGACTACCGCAACGGCGGCTTGGTCATGCTGTTGTGGACCG  
 GTTTGGTCAAATTCATGAAAGACGAAAACCTGCGCTTTATGATTGGTTGCGGCAGTATCGAAATGCG  
 CGACGGCGGCAACGATGCGGGCGGGCCTGTATCATGCTTTGAAAGACAAATACCTCGCTCCGGAACA  
 ATGGCGCGTCAAACCGCTCAACCCGCTCAAATGGGACAGCATCACGCCGTCTGAAAATCCGCCTGT  
 ACCCGCACTGATCAAAGGCTATCTCAAAGCAGGCGCATGGTTCTGCGGCGAGCCTTGCCTCGATGA  
 AGCATTCAACTGCGCGGATGTGCTGATCATGATGGACATCAGCCACCTTTCGGACCGCTACTTGCAG  
 CGTTTTGCCCTAAAACCGATTCATAA

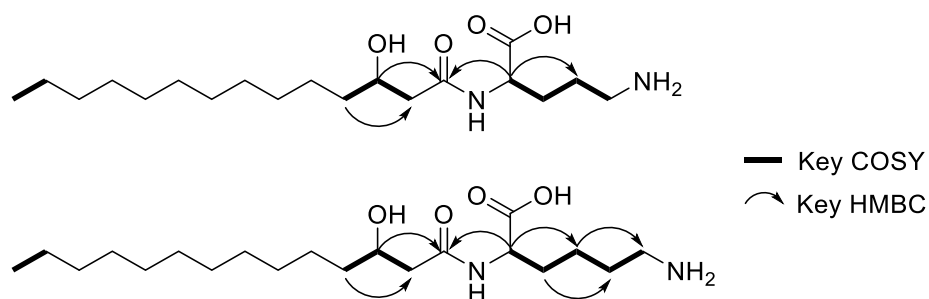

**Figure S1.** Key COSY and HMBC NMR correlations for **1** and **2**.

***N*-3-hydroxymyristoyl-L-ornithine (MH+ 359) (MeOD, 600 MHz)**

|                              | NH | $\alpha$ H | $\beta$ H    | $\gamma$ H | $\delta$ H |                                    |
|------------------------------|----|------------|--------------|------------|------------|------------------------------------|
| <i>N</i> -3-hydroxymyristoyl |    | 2.35       | 3.95         | 1.48       |            | CH2 1.23-1.37<br>Terminal CH3 0.88 |
| Orn                          |    | 4.45       | 1.74<br>1.99 | 1.49       | 2.94       |                                    |

|                              | CO     | $\alpha$ C | $\beta$ C | $\gamma$ C | $\delta$ C |                       |
|------------------------------|--------|------------|-----------|------------|------------|-----------------------|
| <i>N</i> -3-hydroxymyristoyl | 172.92 | 43.16      | 68.38     | 36.87      |            | Terminal<br>CH3 12.93 |
| Orn                          | 173.14 | 51.20      | 28.37     | 22.29      | 38.76      |                       |

***N*-3-hydroxymyristoyl-L-lysine (MH+ 373) (MeOD, 600 MHz)**

|                              | NH | $\alpha$ H | $\beta$ H | $\gamma$ H | $\delta$ H |               |
|------------------------------|----|------------|-----------|------------|------------|---------------|
| <i>N</i> -3-hydroxymyristoyl |    | 2.35       | 3.95      | 1.48       |            | CH2 1.23-1.37 |

|                              |    |        |              |          |          |                                         |
|------------------------------|----|--------|--------------|----------|----------|-----------------------------------------|
| Lys                          |    | 4.42   | 1.92<br>1.70 | 1.49     | 1.66     | Terminal CH3<br>0.88<br>εH 2.90         |
| <i>N</i> -3-hydroxymyristoyl | CO | 172.92 | αC 43.16     | βC 68.38 | γC 36.87 | δC                                      |
| Lys                          |    | 173.66 | 51.47        | 30.76    | 22.29    | 26.52<br>Terminal CH3 12.93<br>εC 39.09 |

**Table S1.** Chemical shifts of natural (bacterially-produced) **1** and **2** as a mixture identified by 1D- and 2D-NMR (gCOSY, gHSQC, gHMBC)

A

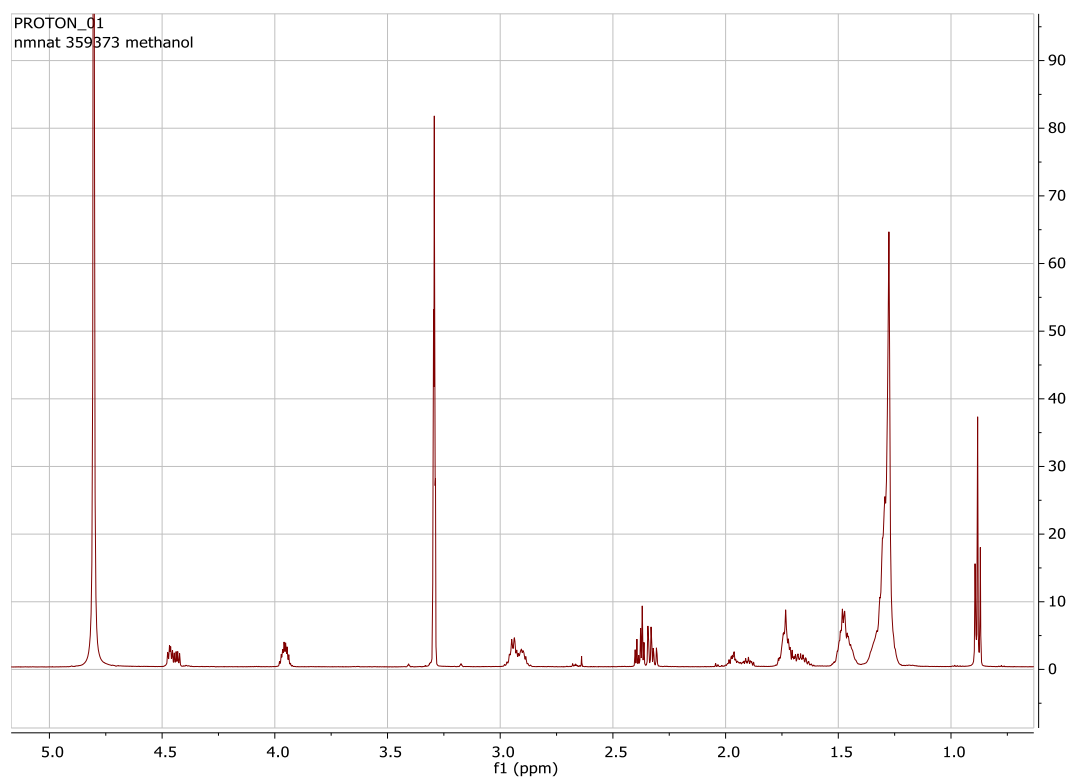

B

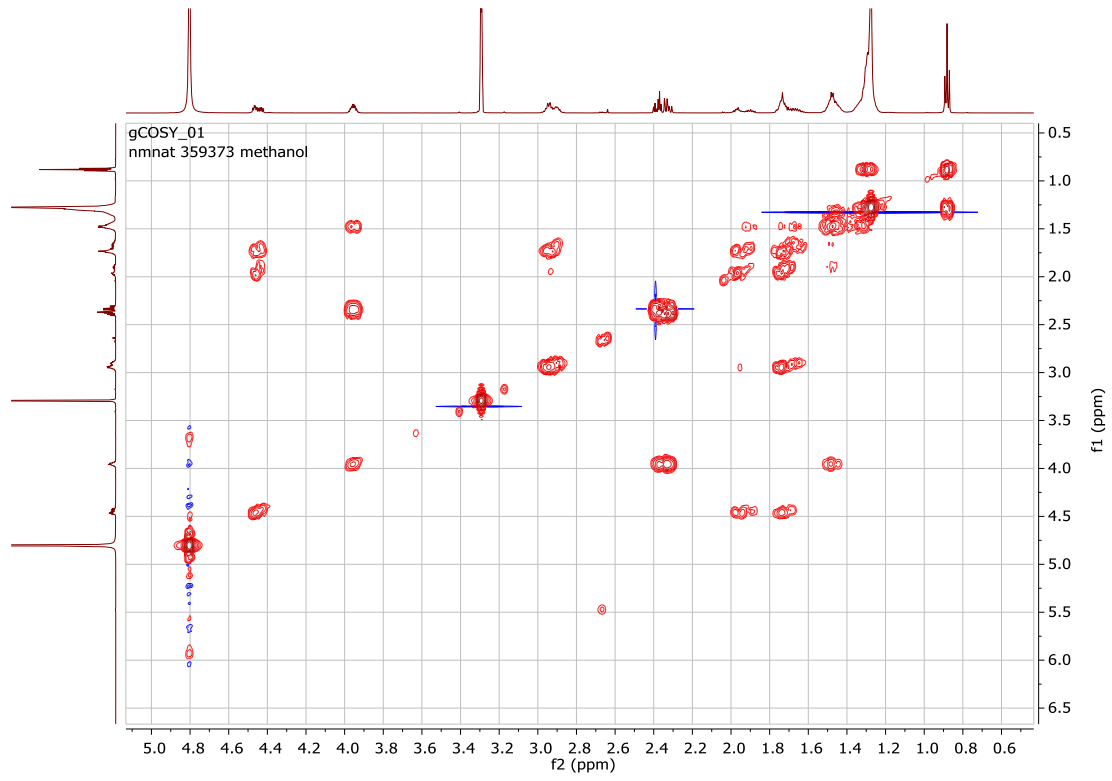

C

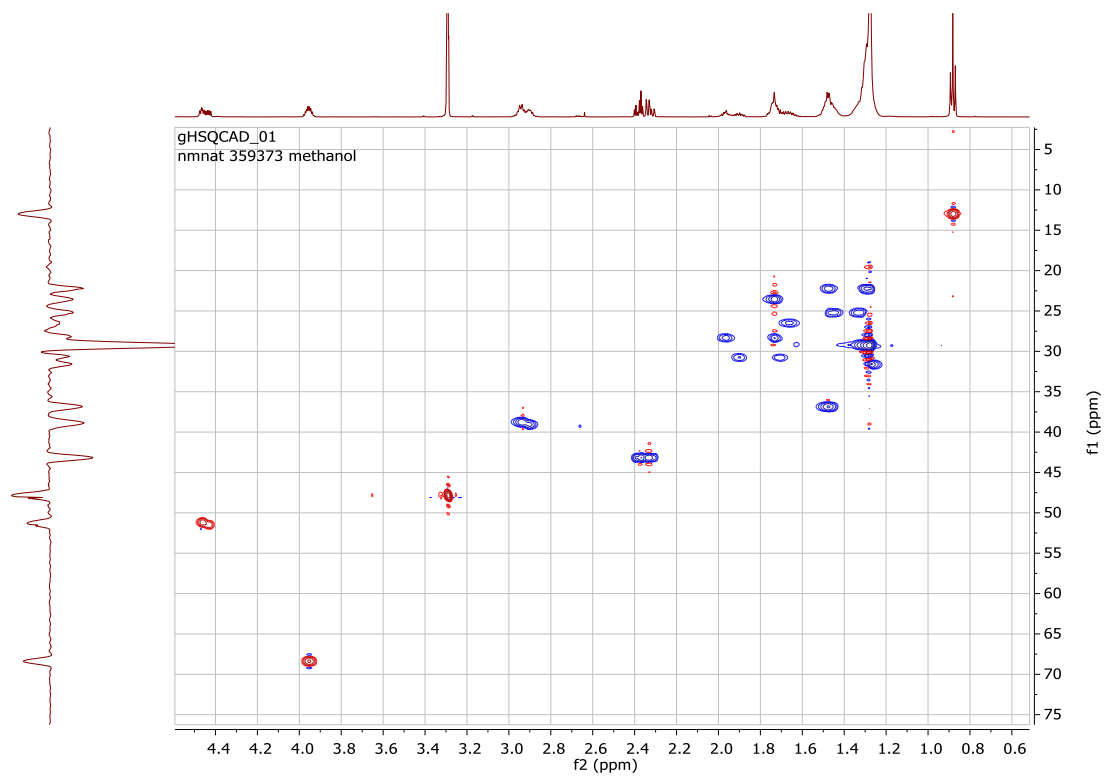

D

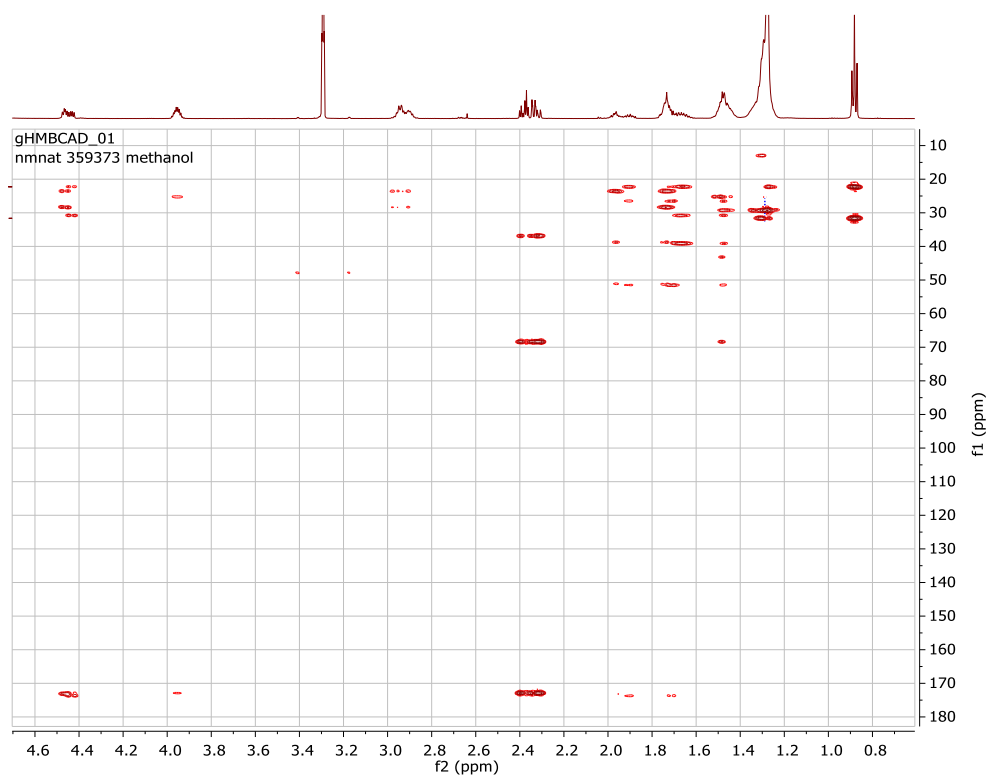

Figure S2. NMR spectra of natural **1** and **2** as a mixture (MeOD, 600 MHz)

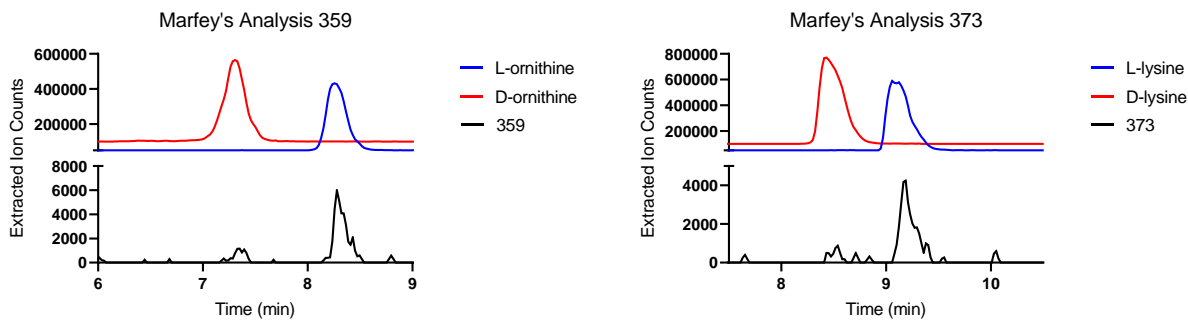

**Figure S3.** Marfey's analysis of **1** and **2**. Extracted ion chromatograms ( $m/z$  385.1466,  $m/z$  399.1623) of the Marfey's product of L-ornithine, D-ornithine, L-lysine, D-lysine, hydrolyzed **1**, hydrolyzed **2** are shown, both (**1** and **2**) of which align in retention time with that of the *S*- configuration of their respective amino acid head groups.

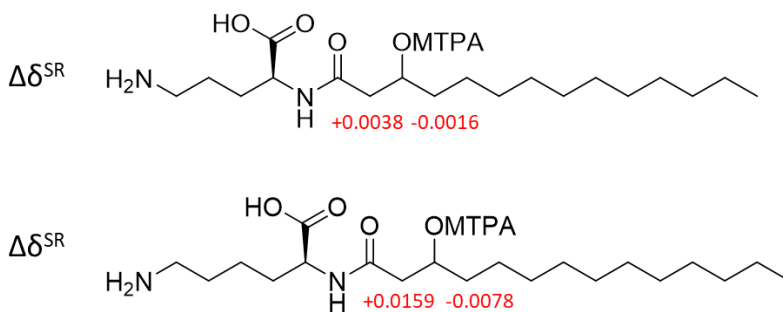

**Figure S4.** The  $\Delta\delta_{S-R}$  in ppm for the MTPA esters of compounds **1** and **2**.

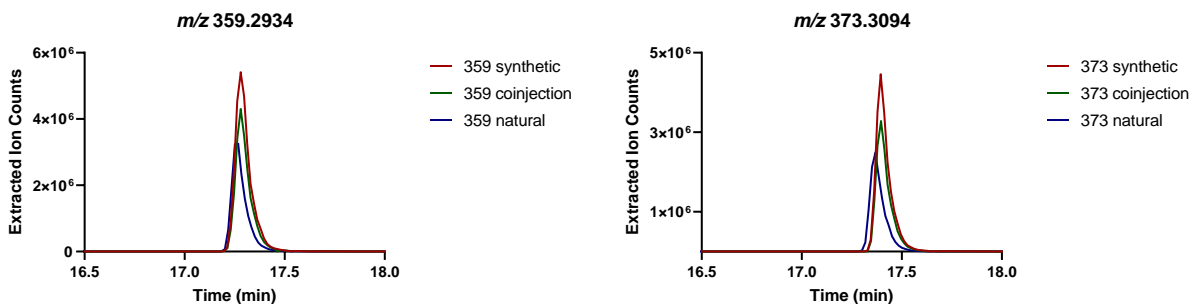

**Figure S5.** Extracted ion chromatogram of crude *NmNAT* extract, synthetic, and co-injection of crude and synthetic **1** and **2**.

***N*-3-hydroxymyristoyl-L-ornithine (MH+ 359) (DMSO, 600 MHz)**

|                              | NH   | $\alpha$ H | $\beta$ H     | $\gamma$ H    | $\delta$ H |                                    |
|------------------------------|------|------------|---------------|---------------|------------|------------------------------------|
| <i>N</i> -3-hydroxymyristoyl |      | 2.16       | 3.72          | 1.30,<br>1.26 |            | CH2 1.20-1.32<br>Terminal CH3 0.82 |
| Orn                          | 7.84 | 4.02       | 1.58,<br>1.72 | 1.55          | 2.74       |                                    |

|                              | CO     | $\alpha$ C | $\beta$ C | $\gamma$ C | $\delta$ C |                       |
|------------------------------|--------|------------|-----------|------------|------------|-----------------------|
| <i>N</i> -3-hydroxymyristoyl | 171.13 | 44.10      | 67.95     | 37.34      |            | Terminal<br>CH3 14.40 |
| Orn                          | 173.92 | 52.51      | 29.27     | 24.26      | 38.99      |                       |

***N*-3-hydroxymyristoyl-L-lysine (MH+ 373) (DMSO, 600 MHz)**

|                              | NH   | $\alpha$ H | $\beta$ H     | $\gamma$ H | $\delta$ H |                                       |
|------------------------------|------|------------|---------------|------------|------------|---------------------------------------|
| <i>N</i> -3-hydroxymyristoyl |      | 2.17       | 3.73          |            |            | CH2 1.20-1.32<br>Terminal CH3<br>0.82 |
| Lys                          | 7.95 | 4.11       | 1.66,<br>1.52 | 1.30       | 1.49       | $\epsilon$ H 2.72                     |

|                              | CO     | $\alpha$ C | $\beta$ C | $\gamma$ C | $\delta$ C |                       |
|------------------------------|--------|------------|-----------|------------|------------|-----------------------|
| <i>N</i> -3-hydroxymyristoyl | 171.33 | 43.98      |           | 36.87      |            | Terminal<br>CH3 14.45 |
| Lys                          | 174.20 | 52.05      | 31.13     | 22.66      | 26.91      | $\epsilon$ C 39.11    |

**Table S2.** Chemical shifts of synthetic **1** and **2** identified by 1D- and 2D- NMR (gCOSY, gHSQC, gHMBC)

A

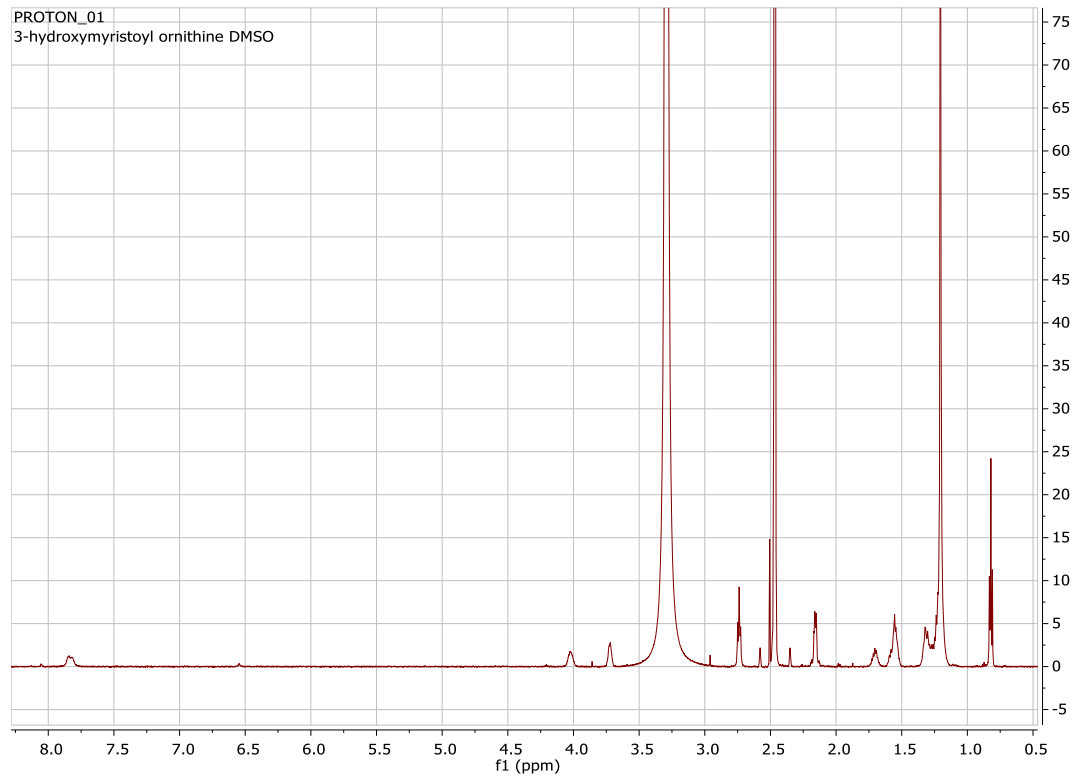

B

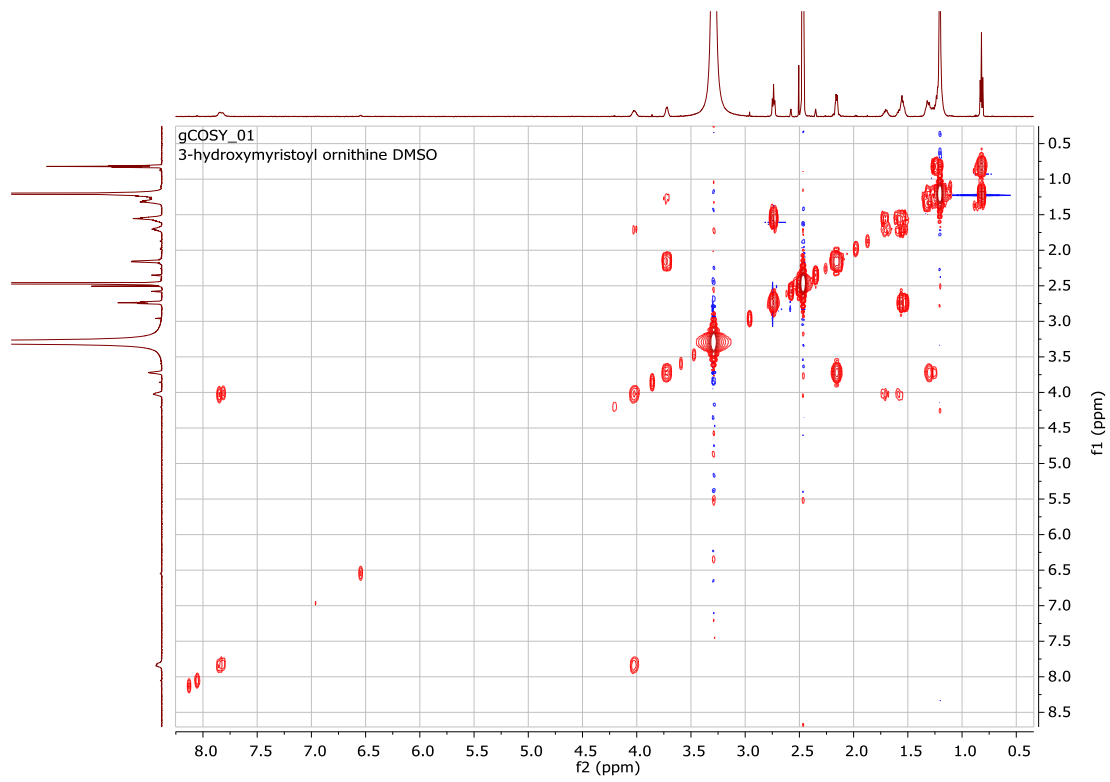

C

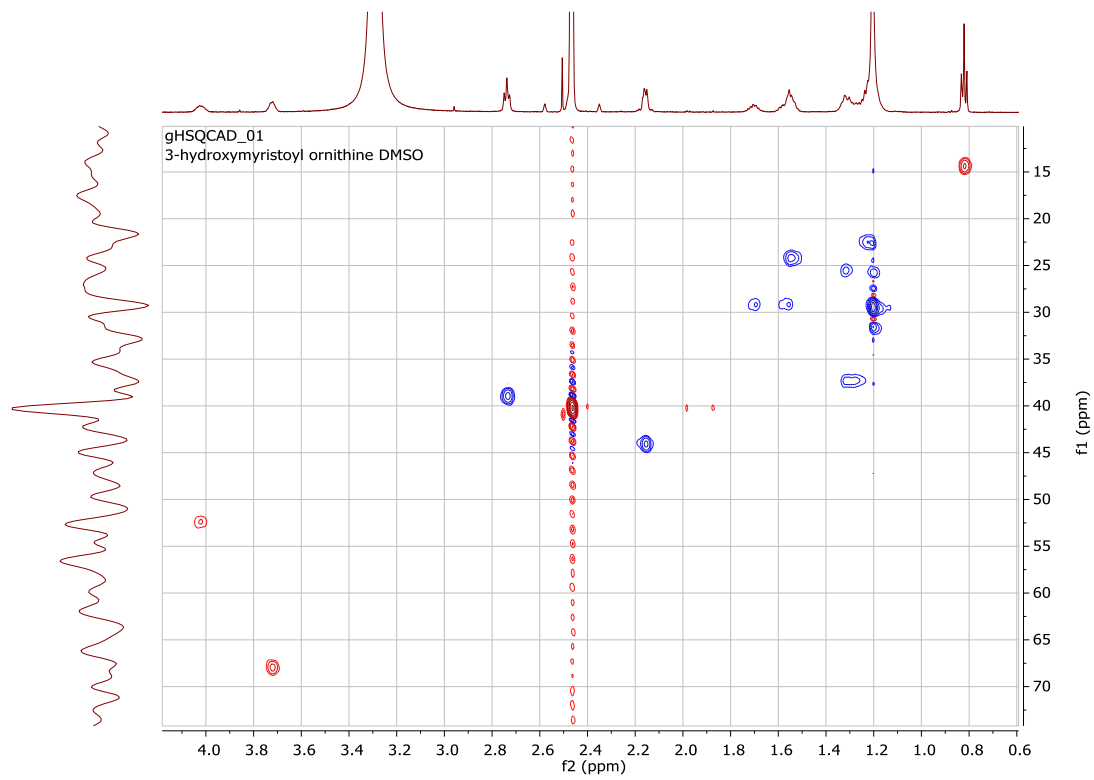

D



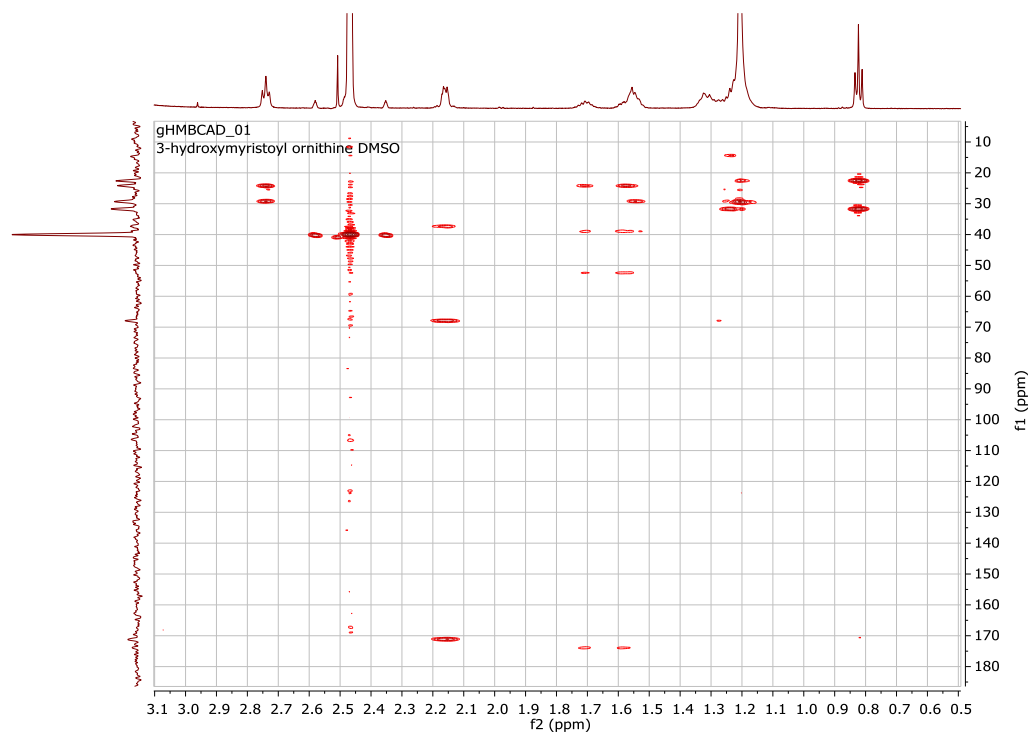

Figure S6. NMR spectra of synthetic compound **1** (DMSO, 600 MHz)

A

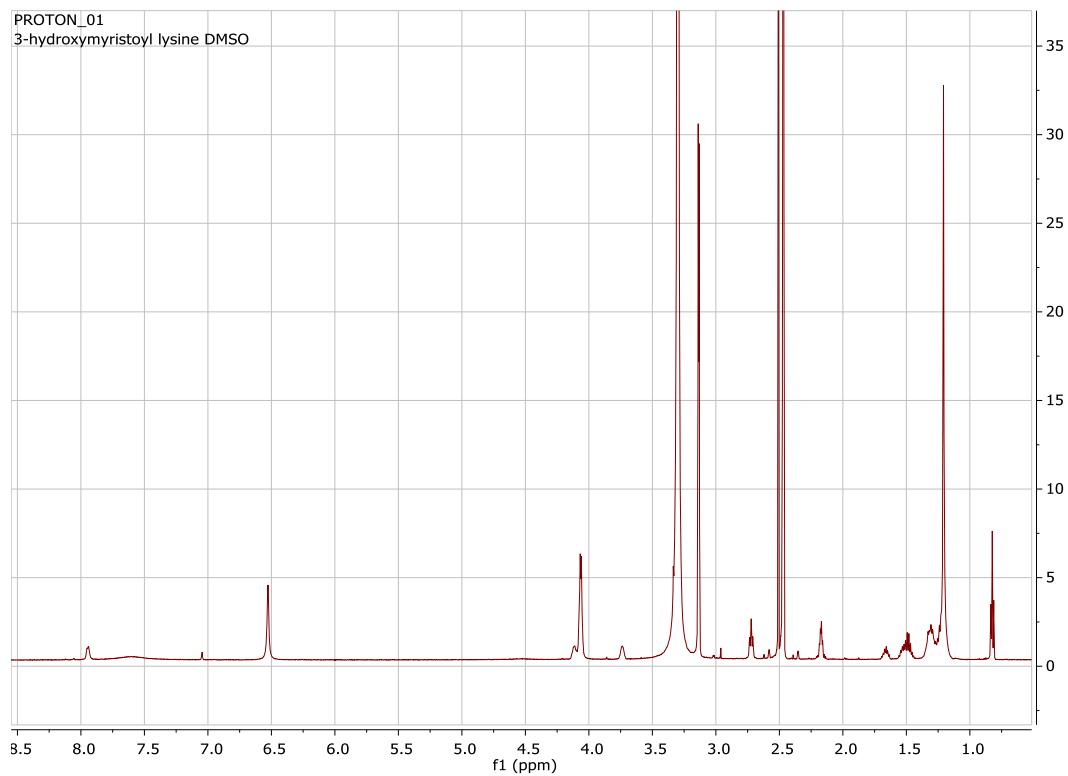

B

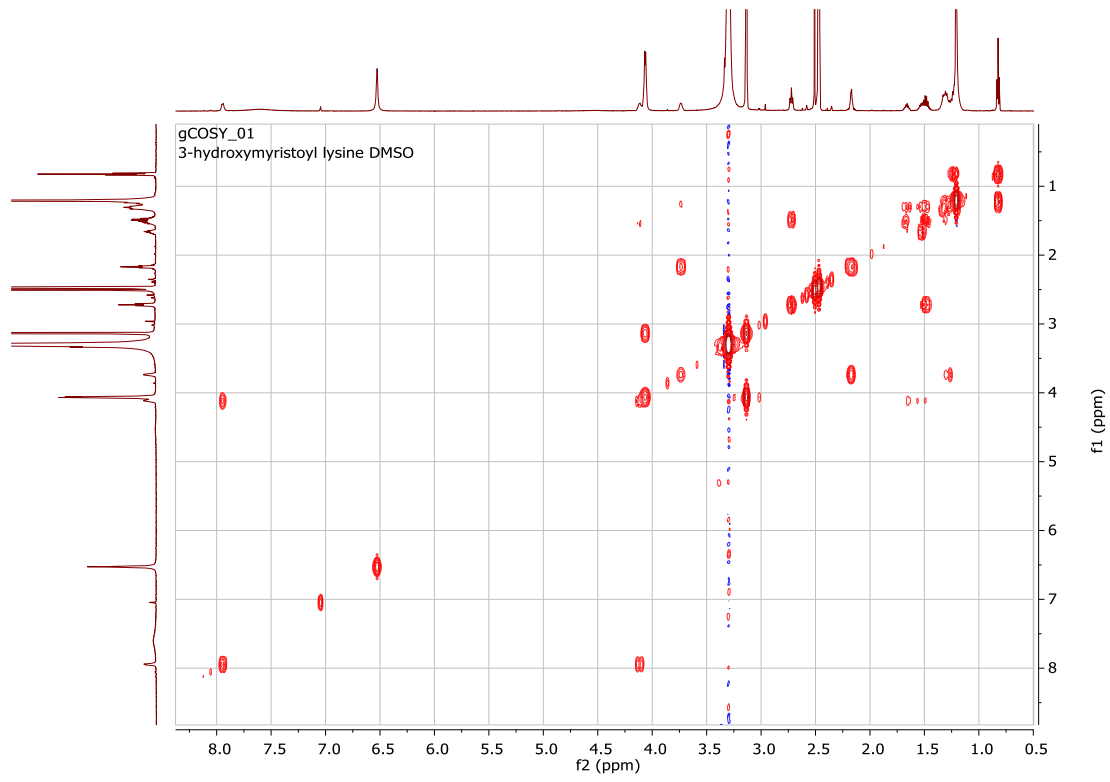

C

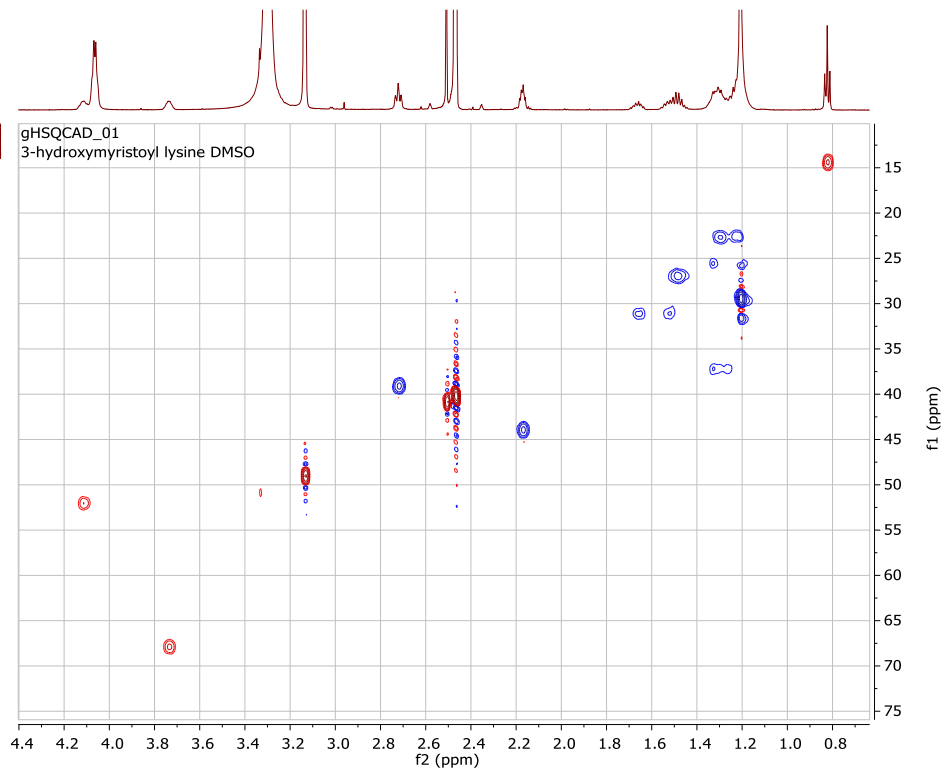

D

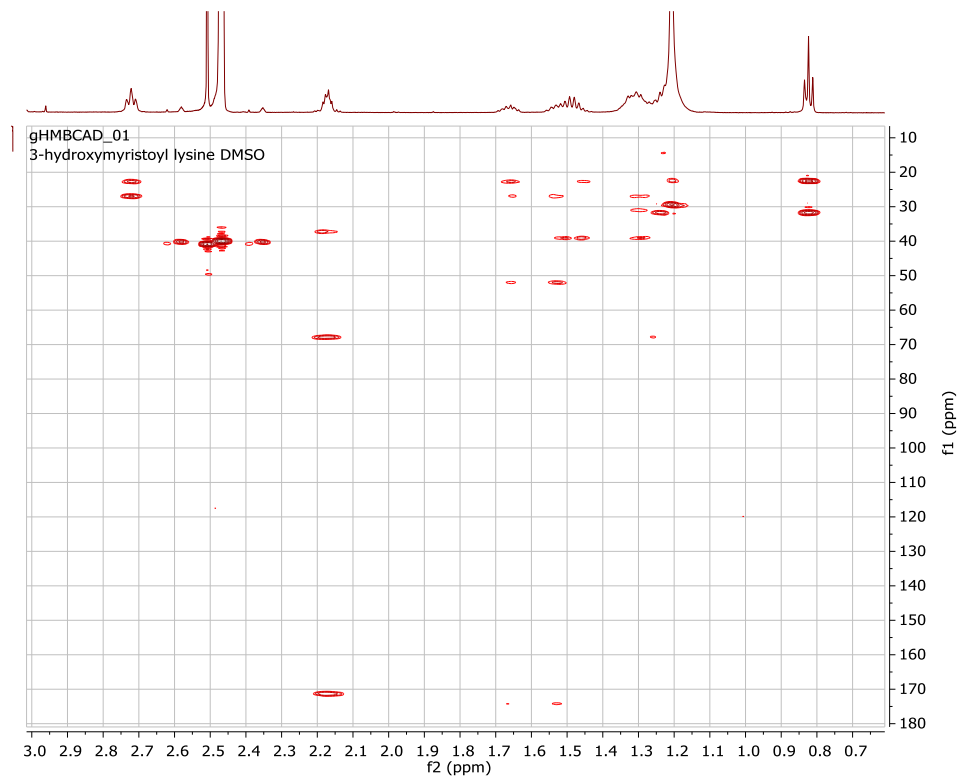

**Figure S7.** NMR spectra of synthetic compound **2** (DMSO, 600 MHz)

A

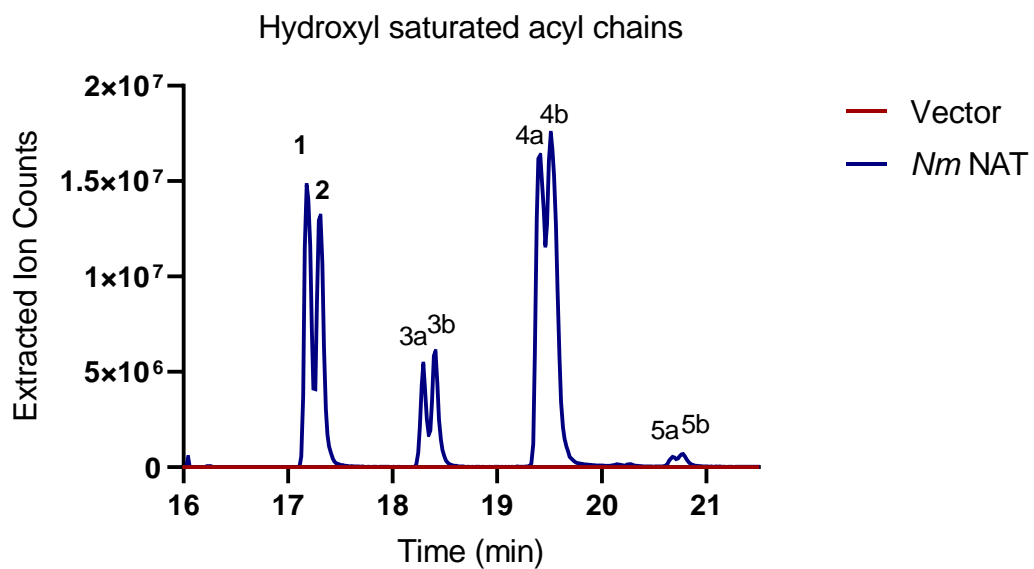

B

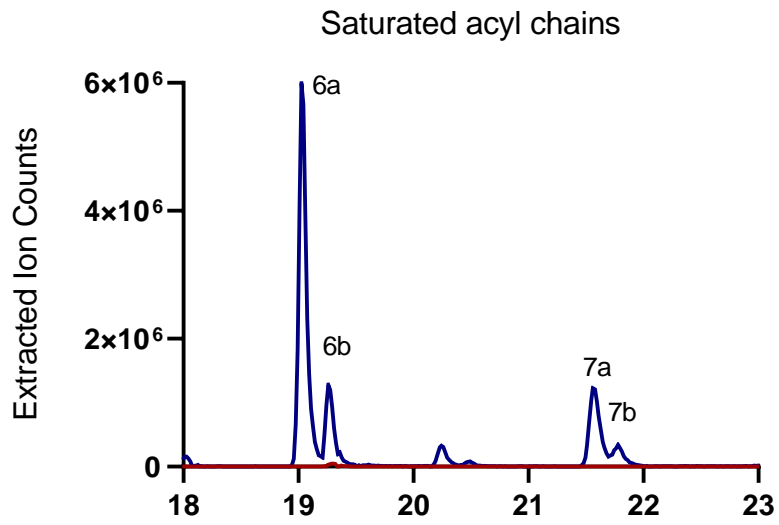

C

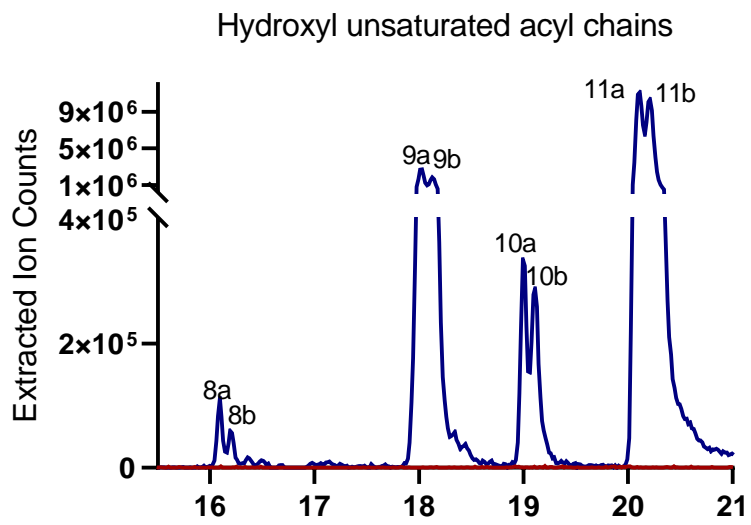

D

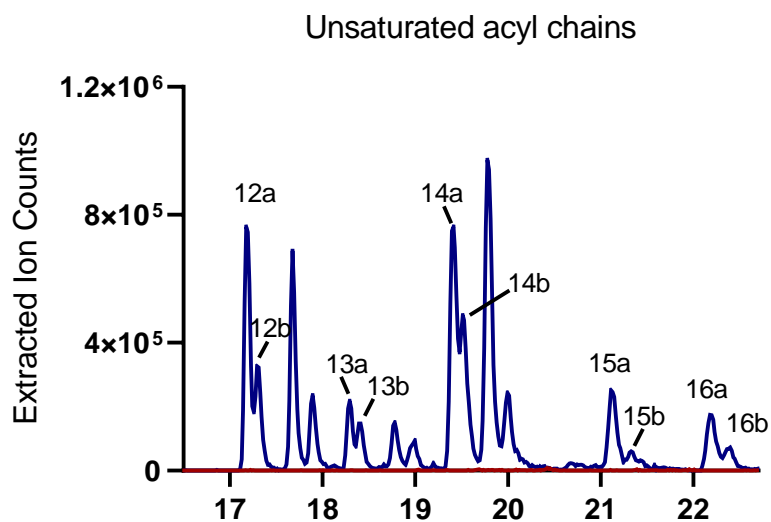

**Figure S8.** Extracted ion chromatograms of all identified *N*-acyl ornithines and lysines from *NmNAT* expression in *E. coli*

| Head Group | Acyl Chain | Compound | Retention Time (min) | Theoretical <i>m/z</i> | Observed <i>m/z</i> | Ppm error |
|------------|------------|----------|----------------------|------------------------|---------------------|-----------|
| Orn        | OH-C14:0   | 1        | 17.177               | 359.2904               | 359.2934            | 8.349792  |
|            | OH-C15:0   | 3a       | 18.294               | 373.3061               | 373.30857           | 6.616554  |
|            | OH-C16:0   | 4a       | 19.411               | 387.3217               | 387.3246            | 7.487316  |
|            | OH-C17:0   | 5a       | 20.678               | 401.3374               | 401.33806           | 1.644502  |
| Lys        | OH-C14:0   | 2        | 17.31                | 373.3061               | 373.3086            | 6.696917  |
|            | OH-C15:0   | 3b       | 18.41                | 387.3217               | 387.3234            | 4.389116  |
|            | OH-C16:0   | 4b       | 19.511               | 401.3374               | 401.33929           | 4.709255  |
|            | OH-C17:0   | 5b       | 20.778               | 415.353                | 415.3536            | 1.444554  |
| Orn        | C14        | 6a       | 19.027               | 343.2955               | 343.29833           | 8.243627  |
|            | C16        | 7a       | 21.561               | 371.3268               | 371.3279            | 2.96235   |
| Lys        | C14        | 6b       | 19.261               | 357.3112               | 357.3132            | 5.597362  |
|            | C16        | 7b       | 21.778               | 385.3425               | *385.34231          | -0.519019 |

|     |          |     |        |          |            |           |
|-----|----------|-----|--------|----------|------------|-----------|
| Orn | OH-C14:1 | 8a  | 16.093 | 357.2748 | 357.2746   | -0.559793 |
|     | OH-C16:1 | 9a  | 18.027 | 385.3061 | 385.3071   | 2.595339  |
|     | OH-C17:1 | 10a | 19.011 | 399.3217 | 399.3218   | 0.250425  |
|     | OH-C18:1 | 11a | 20.111 | 413.3374 | 413.3387   | 3.14513   |
| Lys | OH-C14:1 | 8b  | 16.193 | 371.2904 | *371.2915  | 2.96241   |
|     | OH-C16:1 | 9b  | 18.127 | 399.3217 | 399.3224   | 1.752973  |
|     | OH-C17:1 | 10b | 19.111 | 413.3374 | *413.3376  | 0.483866  |
|     | OH-C18:1 | 11b | 20.211 | 427.353  | 427.3548   | 4.211975  |
| Orn | C14:1    | 12a | 17.177 | 341.2799 | 341.28111  | 3.545477  |
|     | C15:1    | 13a | 18.294 | 355.2955 | 355.2959   | 1.125823  |
|     | C16:1    | 14a | 19.411 | 369.3112 | 369.3113   | 0.270774  |
|     | C17:1    | 15a | 21.111 | 383.3268 | 383.3278   | 2.60874   |
|     | C18:1    | 16a | 22.195 | 397.3425 | 397.3426   | 0.251672  |
| Lys | C14:1    | 12b | 17.293 | 355.2955 | 355.2962   | 1.970191  |
|     | C15:1    | 13b | 18.41  | 369.3112 | *369.31151 | 0.8394    |
|     | C16:1    | 14b | 19.527 | 383.3268 | 383.3275   | 1.826118  |
|     | C17:1    | 15b | 21.311 | 397.3425 | *397.3427  | 0.503344  |
|     | C18:1    | 16b | 22.395 | 411.3581 | *411.3589  | 1.944778  |

**Table S3.** HRMS of all identified *N*-acyl ornithines and lysines from expression of *NmNAT* in *E. coli*. Ions marked with \* are detected but have inconclusive tandem MS spectra

#### OH-C14:0 Ornithine

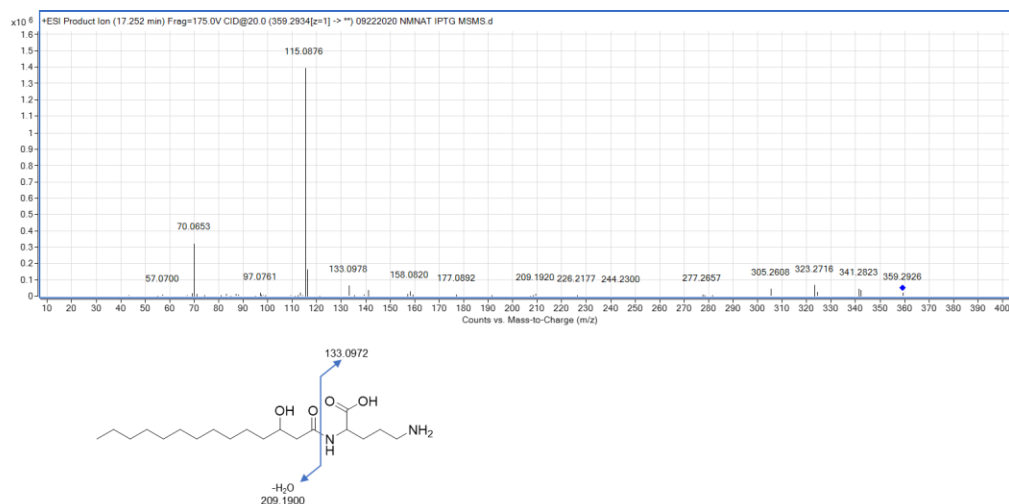

#### OH-C15:0 Ornithine

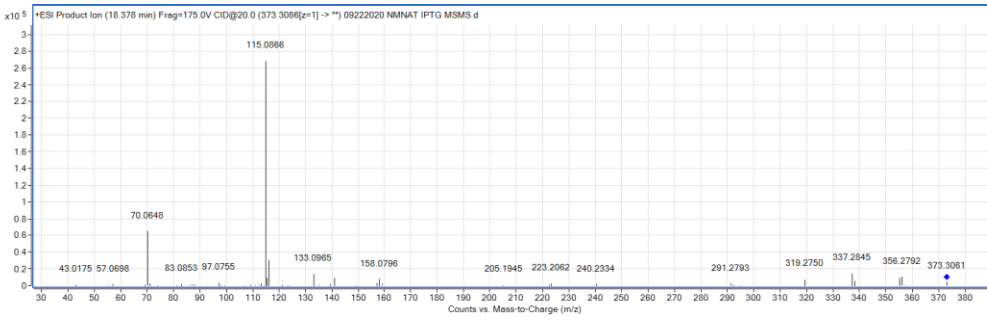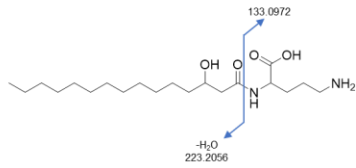

OH-C16:0 Ornithine

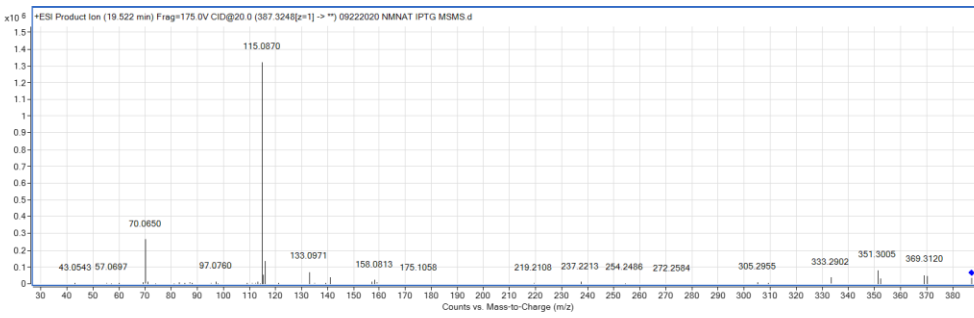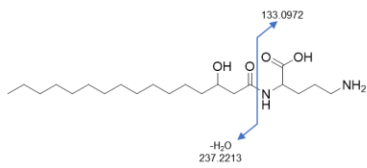

OH-C17:0 Ornithine

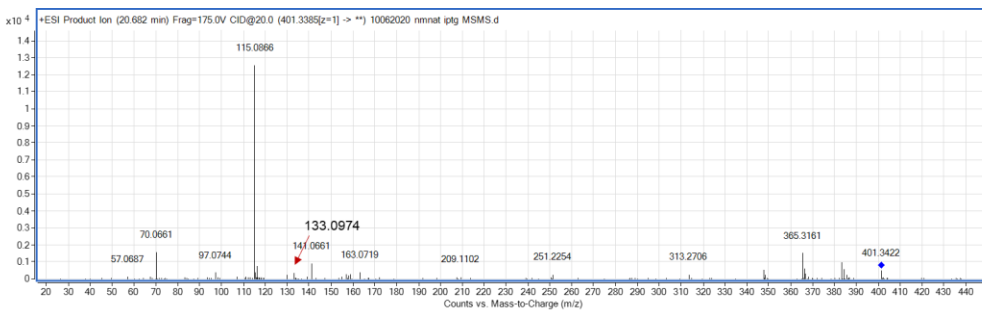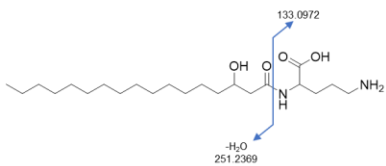

OH-C14:0 Lysine

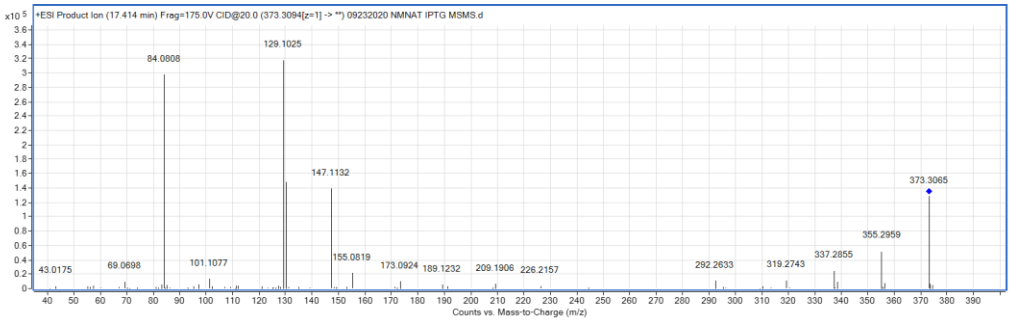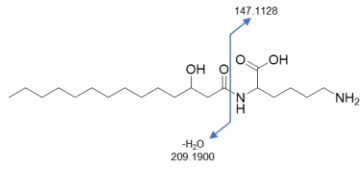

### OH-C15:0 Lysine

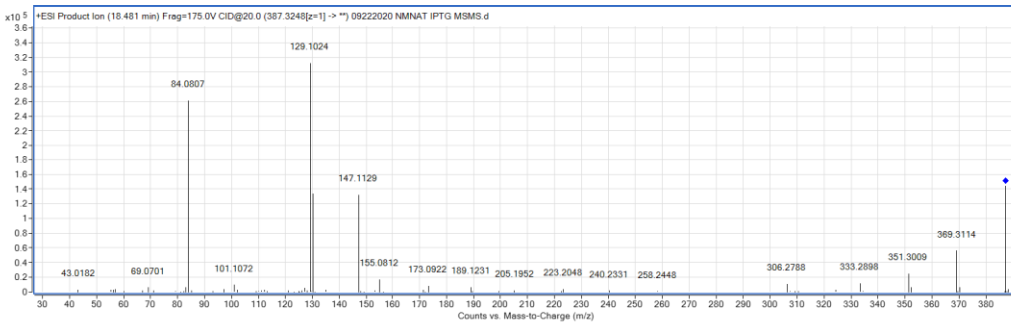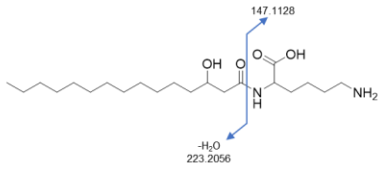

### OH-C16:0 Lysine

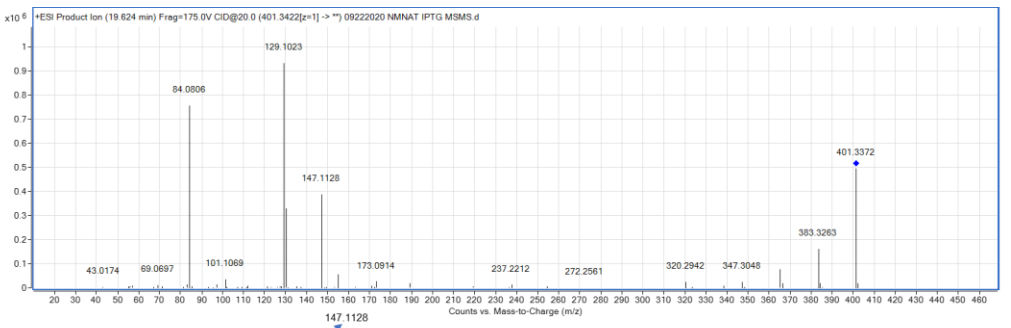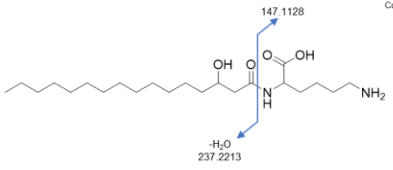

### OH-C17:0 Lysine



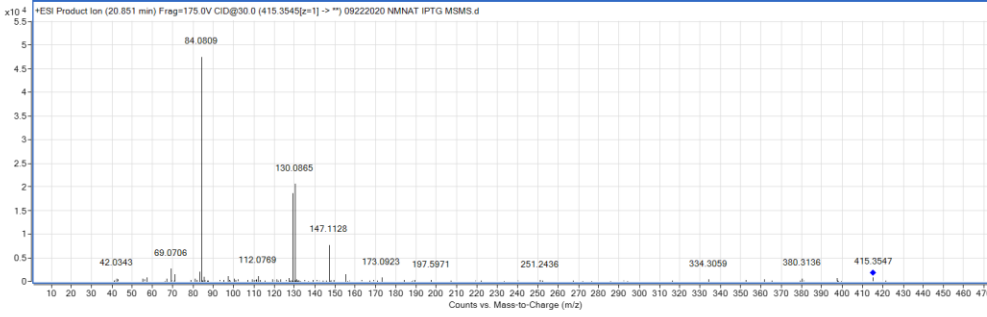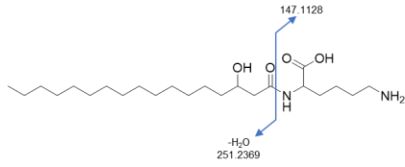

### C14:0 Ornithine

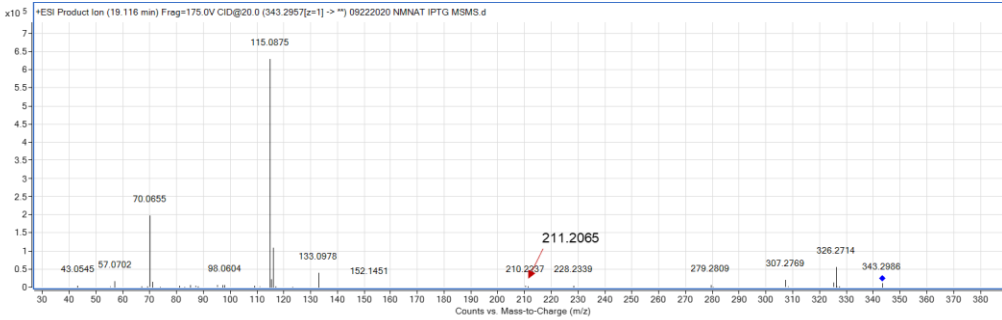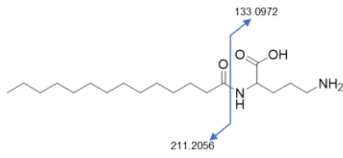

### C16:0 Ornithine

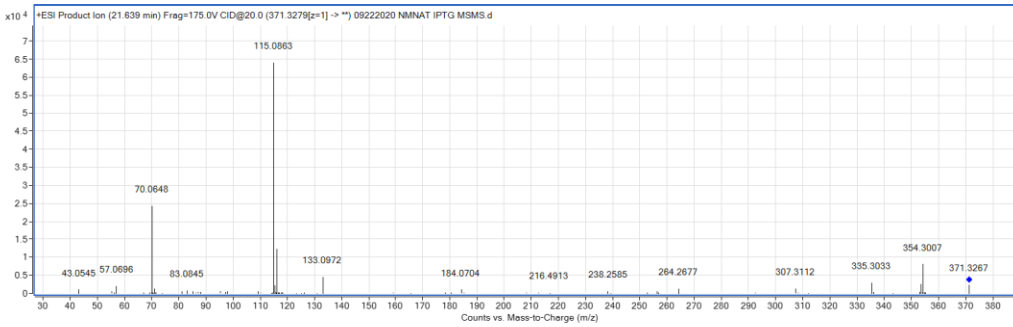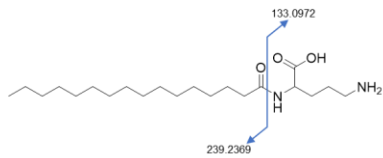

### C14:0 Lysine

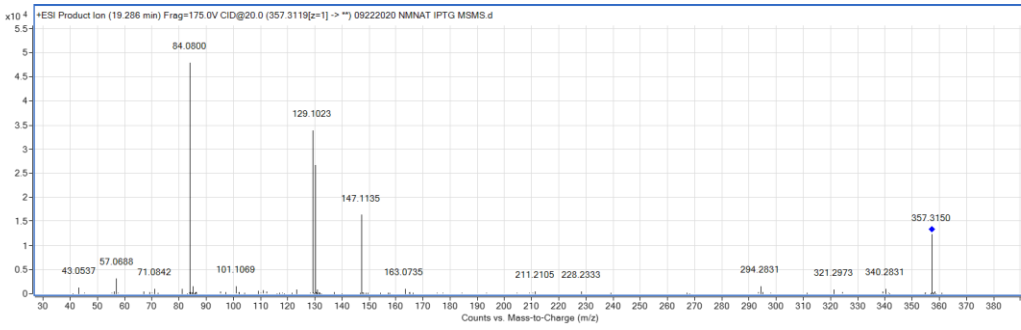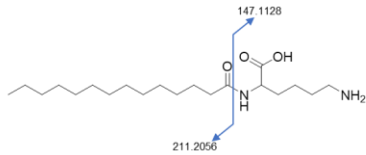

OH-C14:1 Ornithine

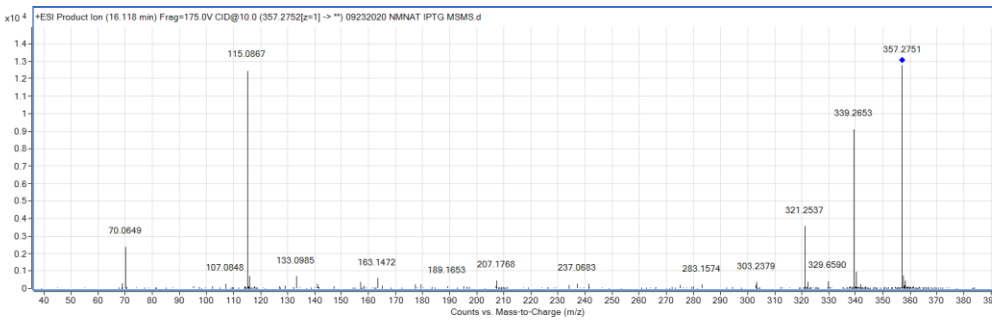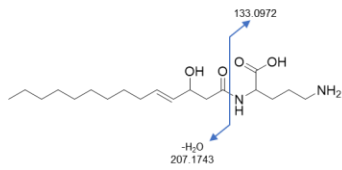

OH-C16:1 Ornithine

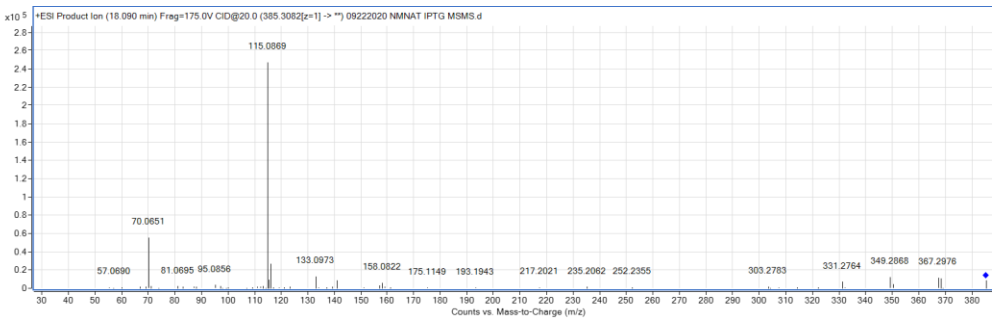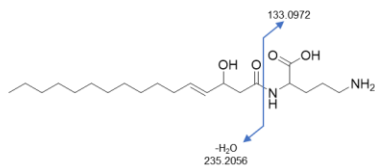

OH-C17:1 Ornithine

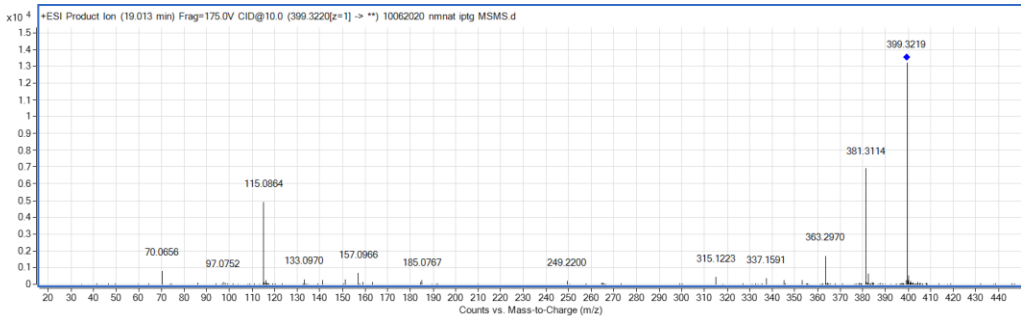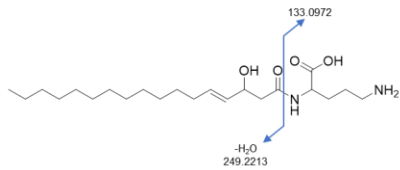

OH-C18:1 Ornithine

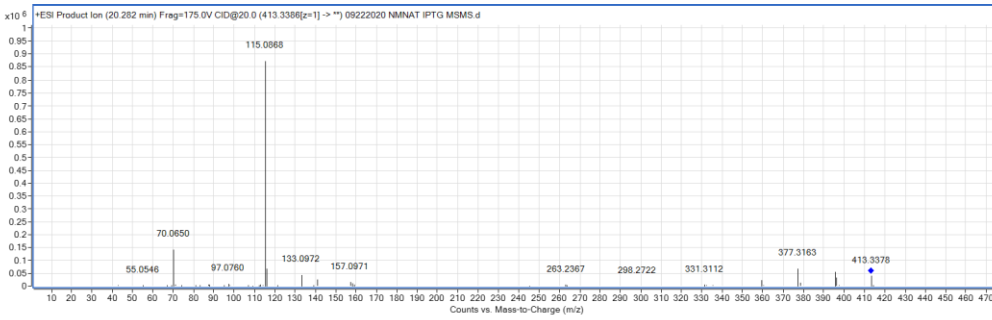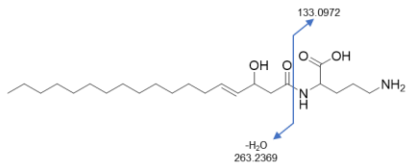

OH-C16:1 Lysine

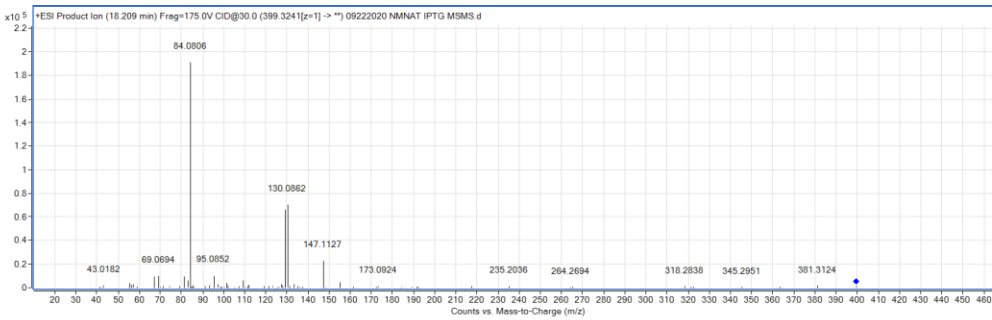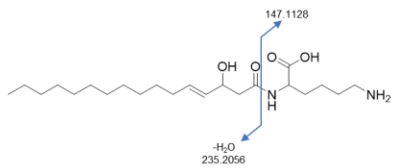

OH-C18:1 Lysine

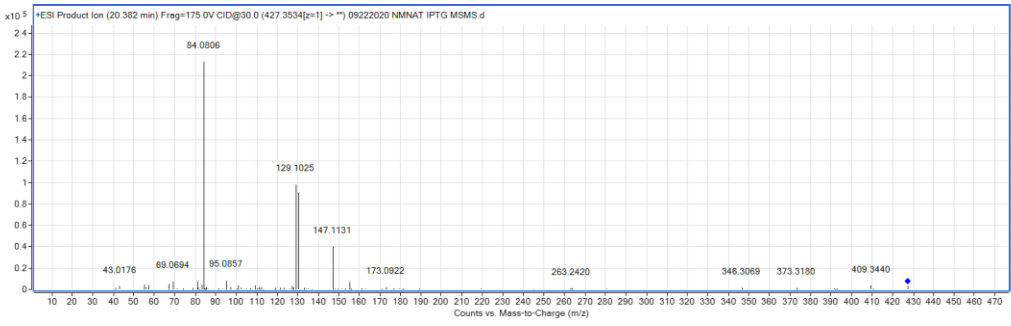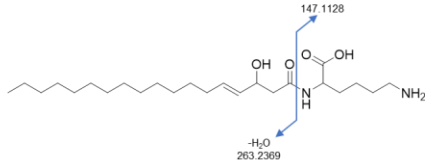

C14:1 Ornithine

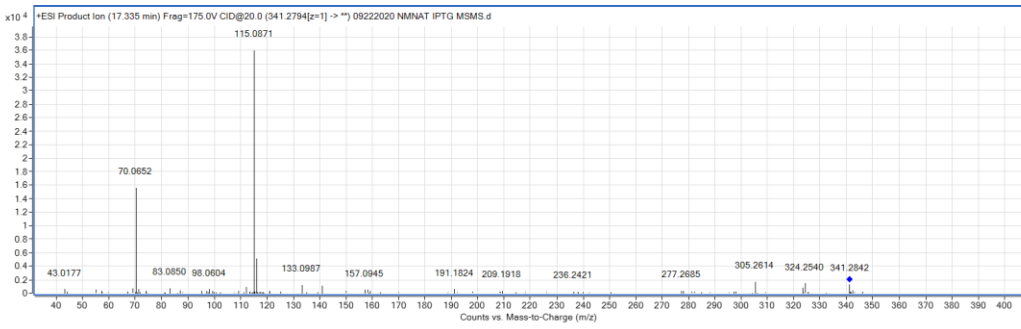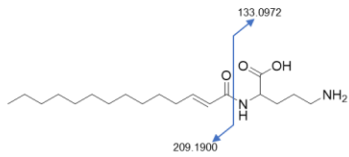

C15:1 Ornithine

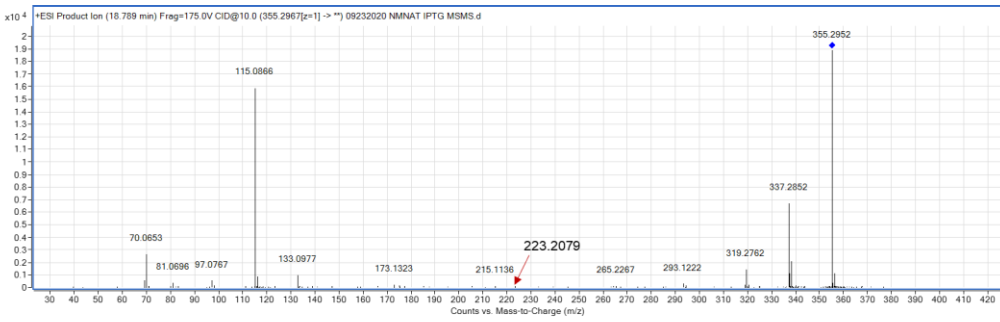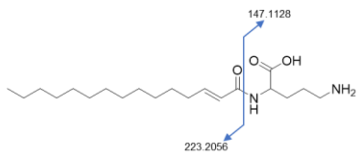

C16:1 Ornithine

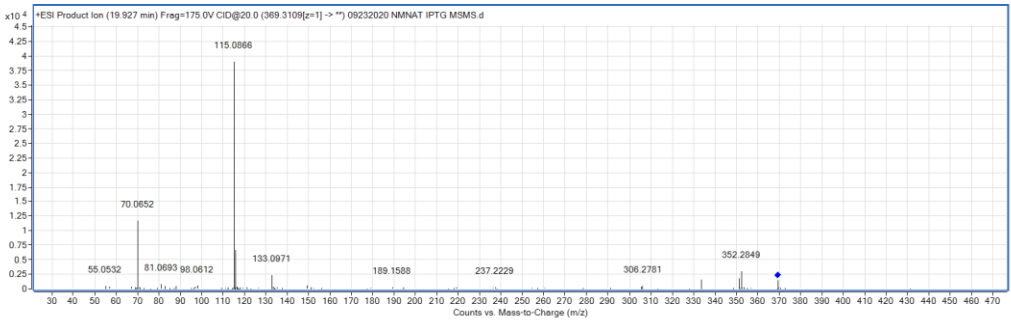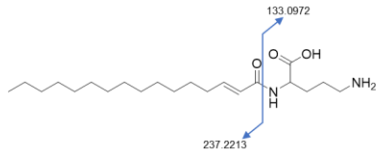

### C17:1 Ornithine

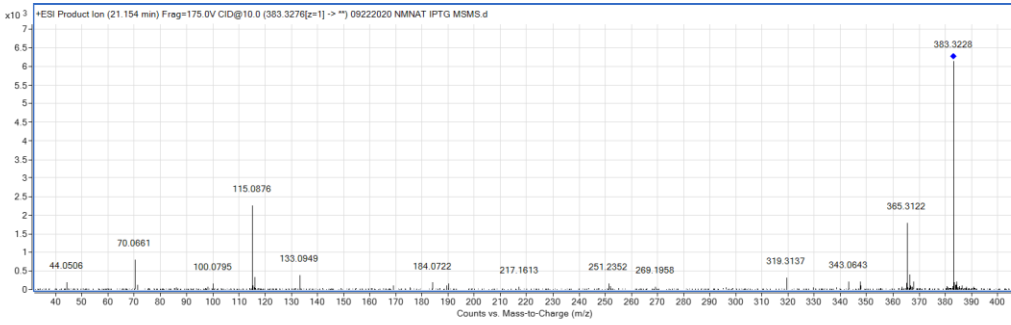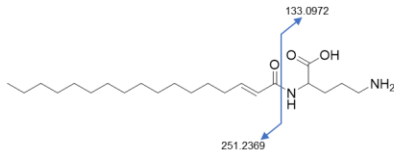

### C18:1 Ornithine

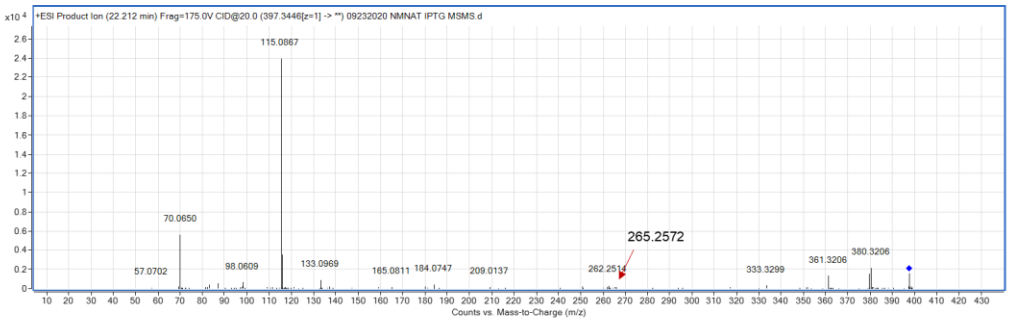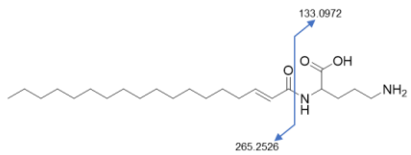

### C14:1 Lysine

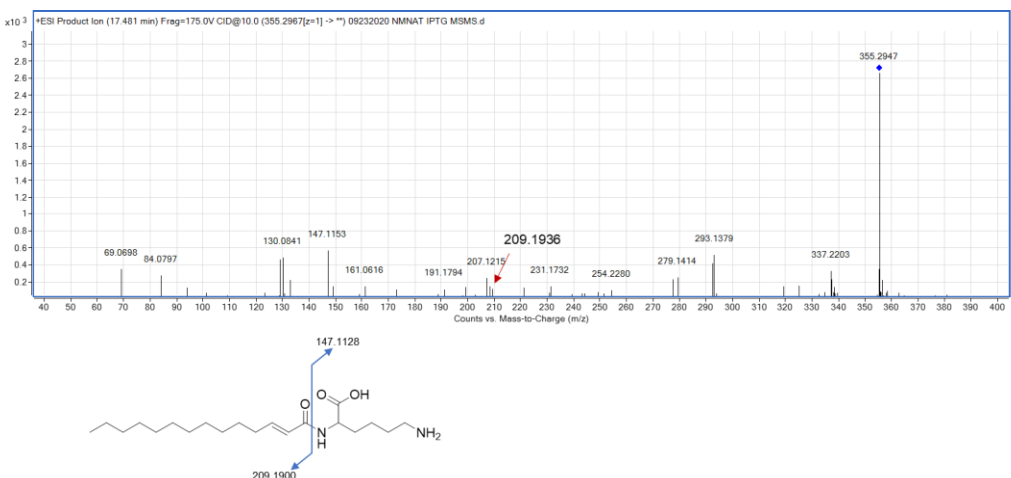

### C16:1 Lysine

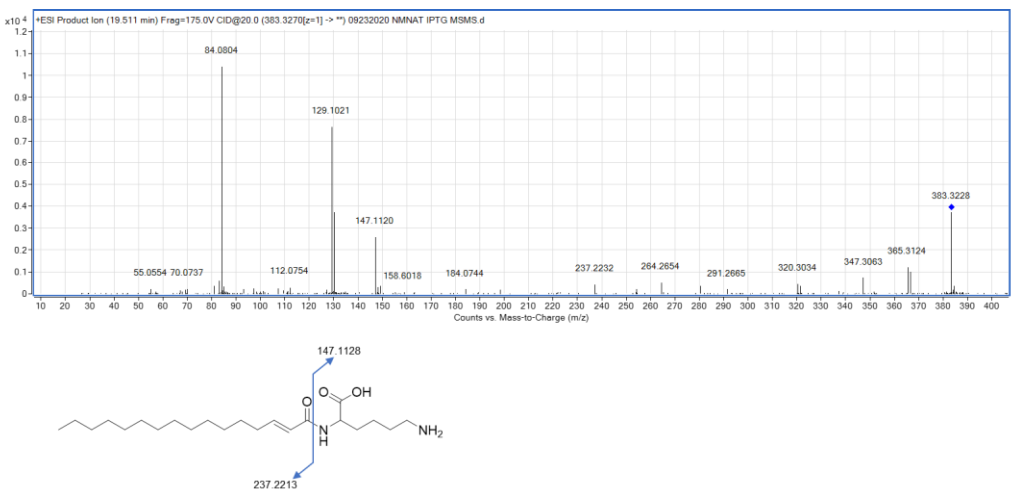

**Figure S9.** Tandem MS of 24 of the 30 *N*-acyl amides detected from *NmNAT* expression. Corresponding structures show deduced structures, where regiochemistry of hydroxyl groups and unsaturation, as well as stereochemistry of points of unsaturation are assumed. The straight acyl chain is also a simplification, as they may occur as branched chain fatty acids.

### Structural elucidation of 3 and 4

| Compound | Molecular Formula                               | Theoretical <i>m/z</i> | Observed <i>m/z</i> | Ppm error |
|----------|-------------------------------------------------|------------------------|---------------------|-----------|
| 3        | C <sub>16</sub> H <sub>31</sub> NO <sub>3</sub> | 286.2377               | 286.2381            | 1.39744   |
| 4        | C <sub>19</sub> H <sub>29</sub> NO <sub>3</sub> | 320.222                | 320.2229            | 2.81055   |

**Table S4.** Theoretical and observed HRMS values of compounds 3 and 4

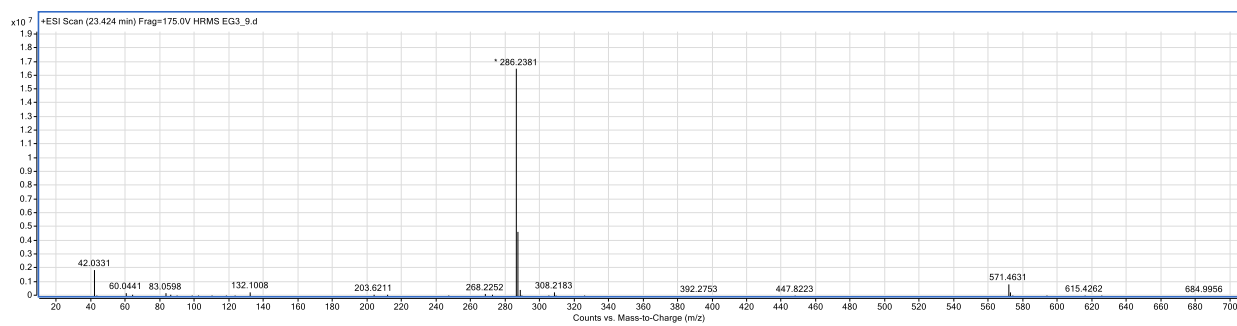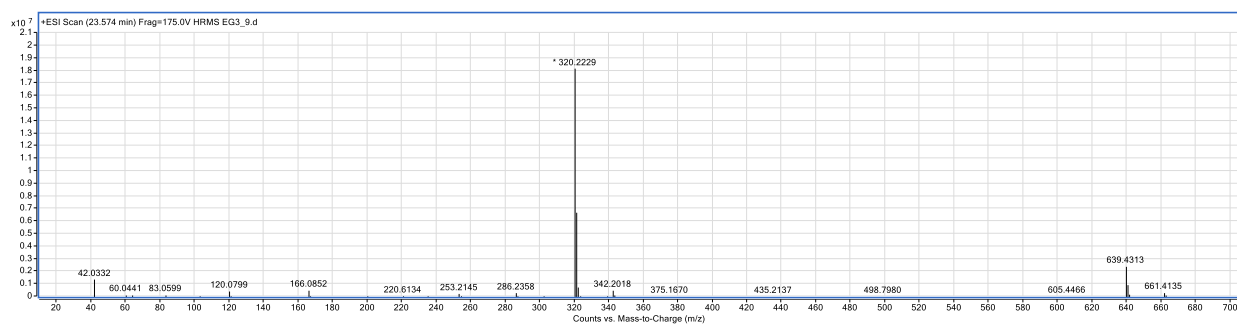

**Figure S10.** HRMS of compounds **3** and **4**

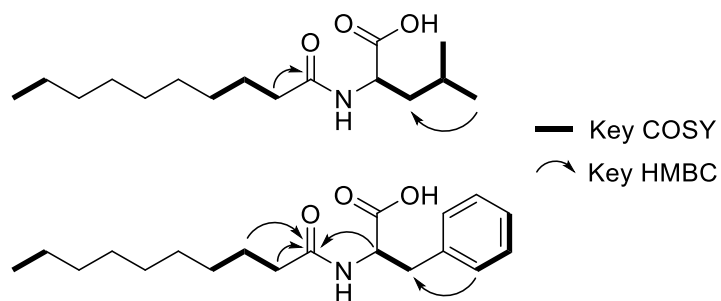

**Figure S11.** Key COSY and HMBC correlations of natural **3** and **4** identified from a mixture

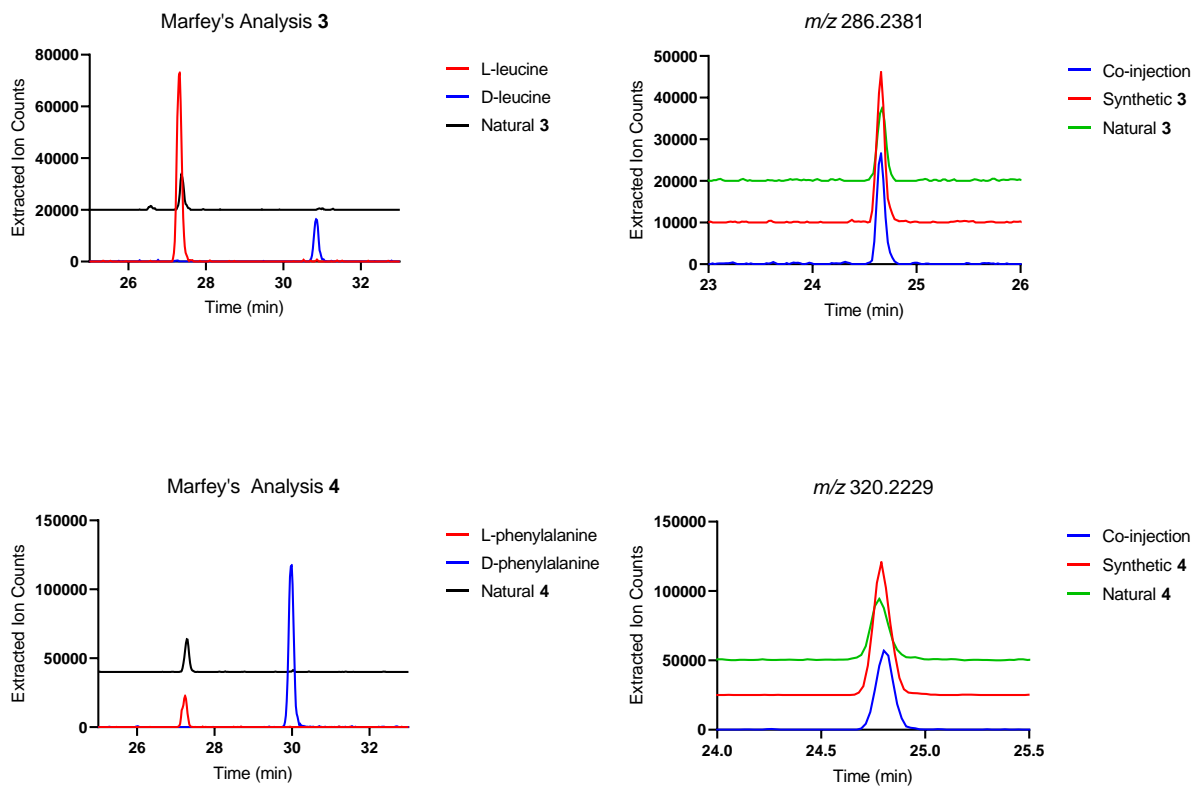

**Figure S12.** Marfey's analysis for stereochemical elucidation of compounds **3** and **4** (left). Co-injection with synthetic **3** and **4** for validation of structure (right).

***N*-decanoyl-L-leucine (MH+ 286) (CDCl<sub>3</sub>, 400 MHz)**

|                    | NH   | $\alpha$ H | $\beta$ H    | $\gamma$ H | $\delta$ H                                                 |
|--------------------|------|------------|--------------|------------|------------------------------------------------------------|
| <i>N</i> -decanoyl |      | 2.26       | 1.64         |            | CH <sub>2</sub> 1.25-1.35<br>Terminal CH <sub>3</sub> 0.89 |
| Leu                | 8.05 | 4.62       | 1.74<br>1.60 | 1.73       | 0.97                                                       |

  

|                    | CO     | $\alpha$ C | $\beta$ C | $\gamma$ C | $\delta$ C                                                              |
|--------------------|--------|------------|-----------|------------|-------------------------------------------------------------------------|
| <i>N</i> -decanoyl | 174.17 | 36.50      | 25.61     |            | CH <sub>2</sub> 21.86, 29.19-31.86<br>Terminal<br>CH <sub>3</sub> 14.07 |
| Leu                | 176.39 | 50.93      | 41.16     | 24.91      | 22.65<br>22.83                                                          |

**Table S5.** Chemical shifts of synthetic **3** as identified by 1D- (<sup>1</sup>H and <sup>13</sup>C) and 2D- (gCOSY) NMR



**N-decanoyl-L-phenylalanine (MH+ 320) (DMSO, 400 MHz)**

|            | NH   | $\alpha$ H | $\beta$ H |                   |       |
|------------|------|------------|-----------|-------------------|-------|
| N-decanoyl |      | 2.03       | 1.39      | CH2 1.08-1.32     |       |
| Phe        | 8.07 | 4.43       | 2.84      | Terminal CH3 0.87 | 12.65 |
|            |      |            | 3.06      | Aromatic          | COOH  |
|            |      |            |           | 7.17-7.29         |       |

  

|            | CO     | $\alpha$ C | $\beta$ C |                    |
|------------|--------|------------|-----------|--------------------|
| N-decanoyl | 172.57 | 35.53      | 25.63     | CH2 22.55-31.69    |
| Phe        | 173.69 | 53.77      | 37.24     | Terminal CH3 14.39 |
|            |        |            |           | Aromatic           |
|            |        |            |           | 126.77-138.26      |

**Table S6.** Chemical shifts of synthetic **3** as identified by 1D- ( $^1\text{H}$  and  $^{13}\text{C}$ ) and 2D- (gCOSY) NMR

A

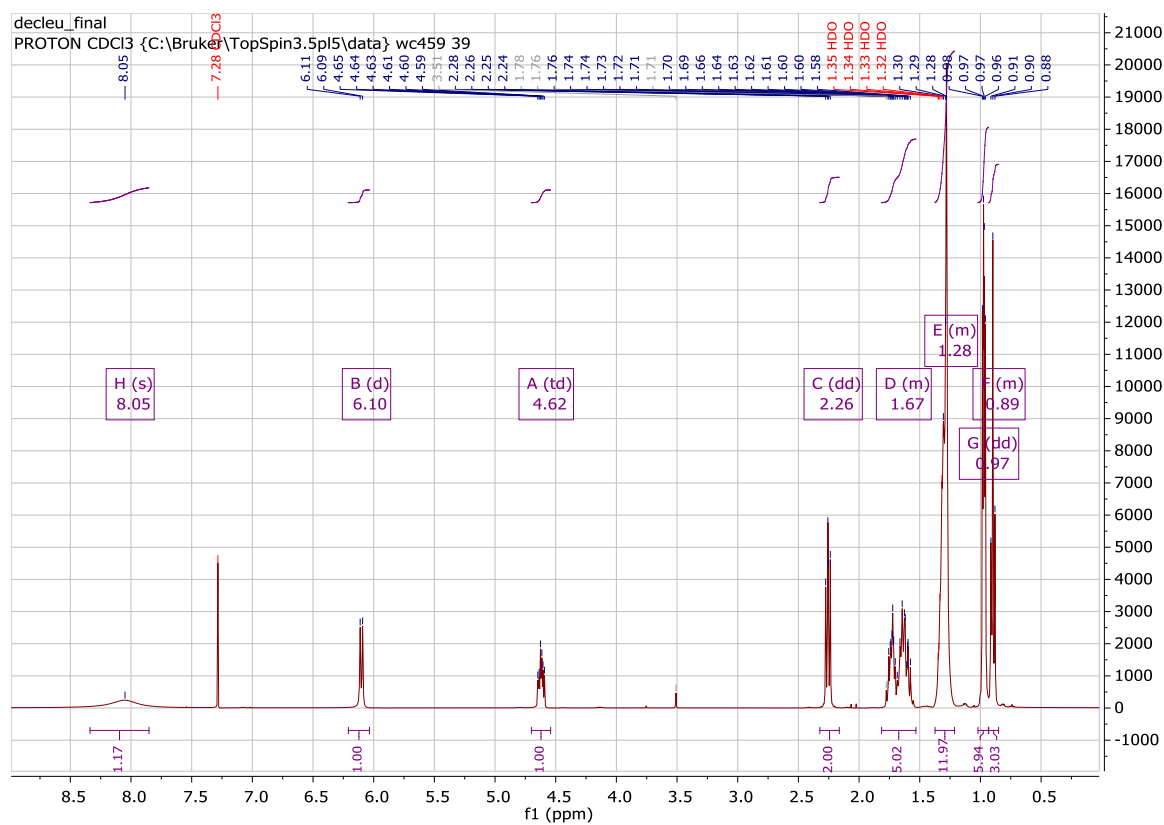

B

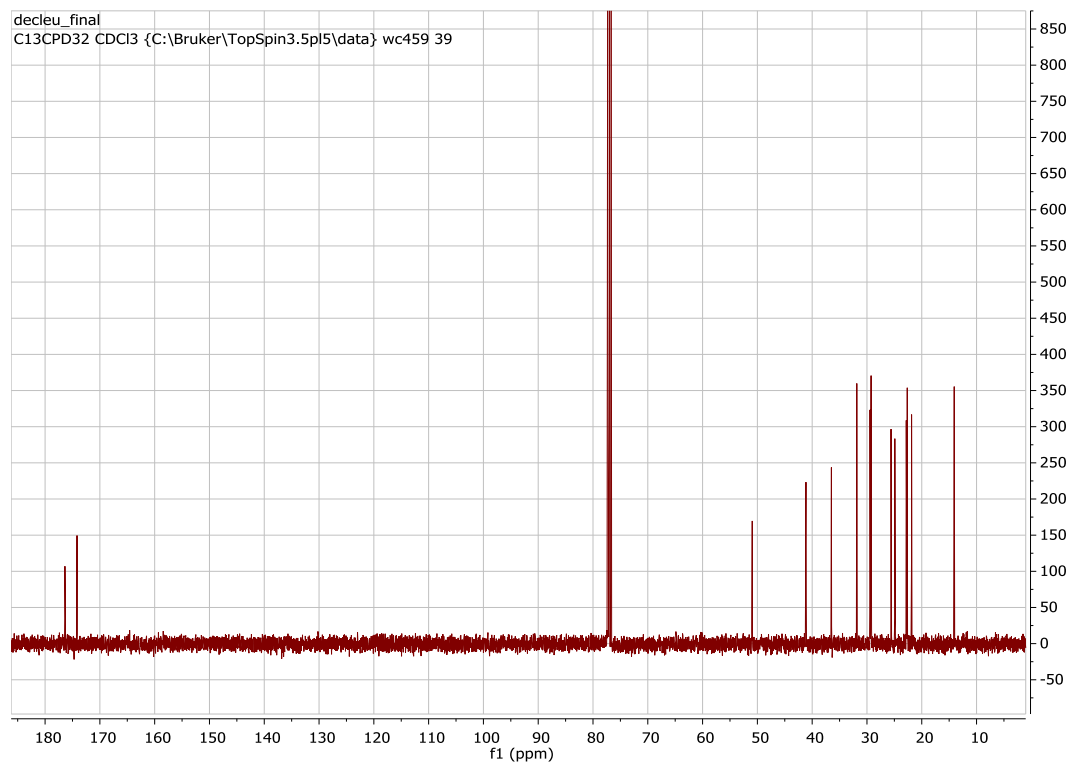

C

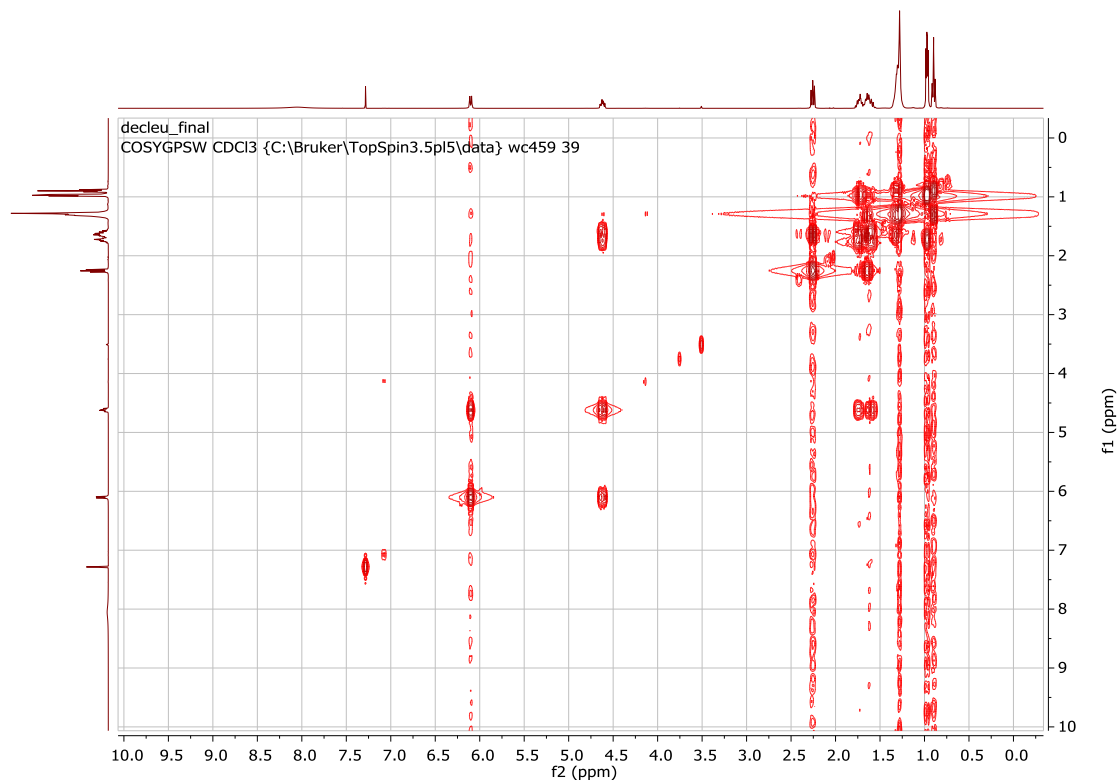

**Figure S13.** NMR spectra of synthetic compound **3** (CDCl<sub>3</sub>, 400 MHz)

A

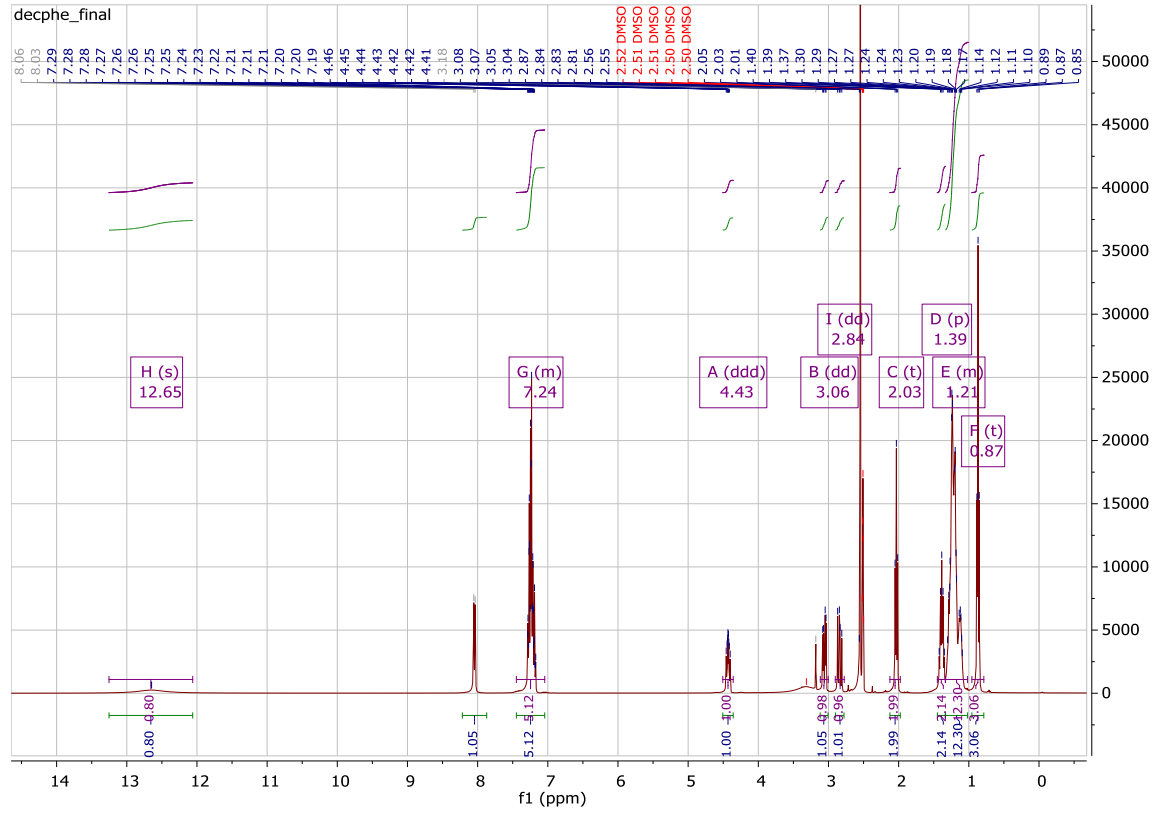

B

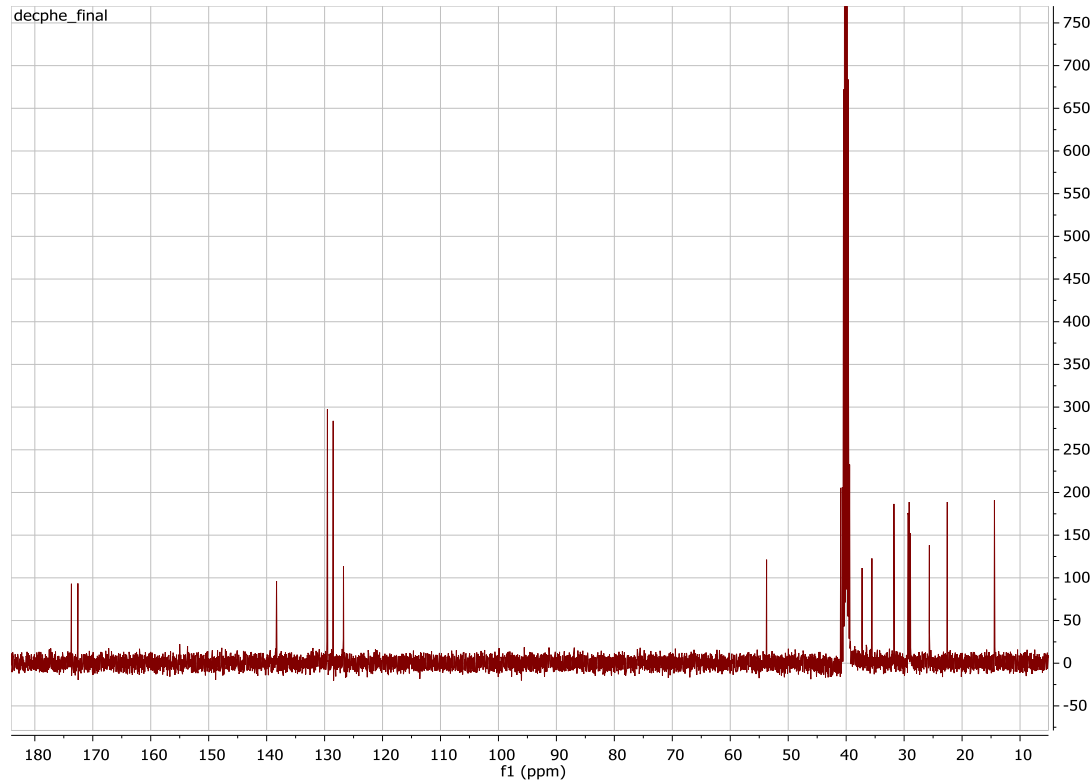

C

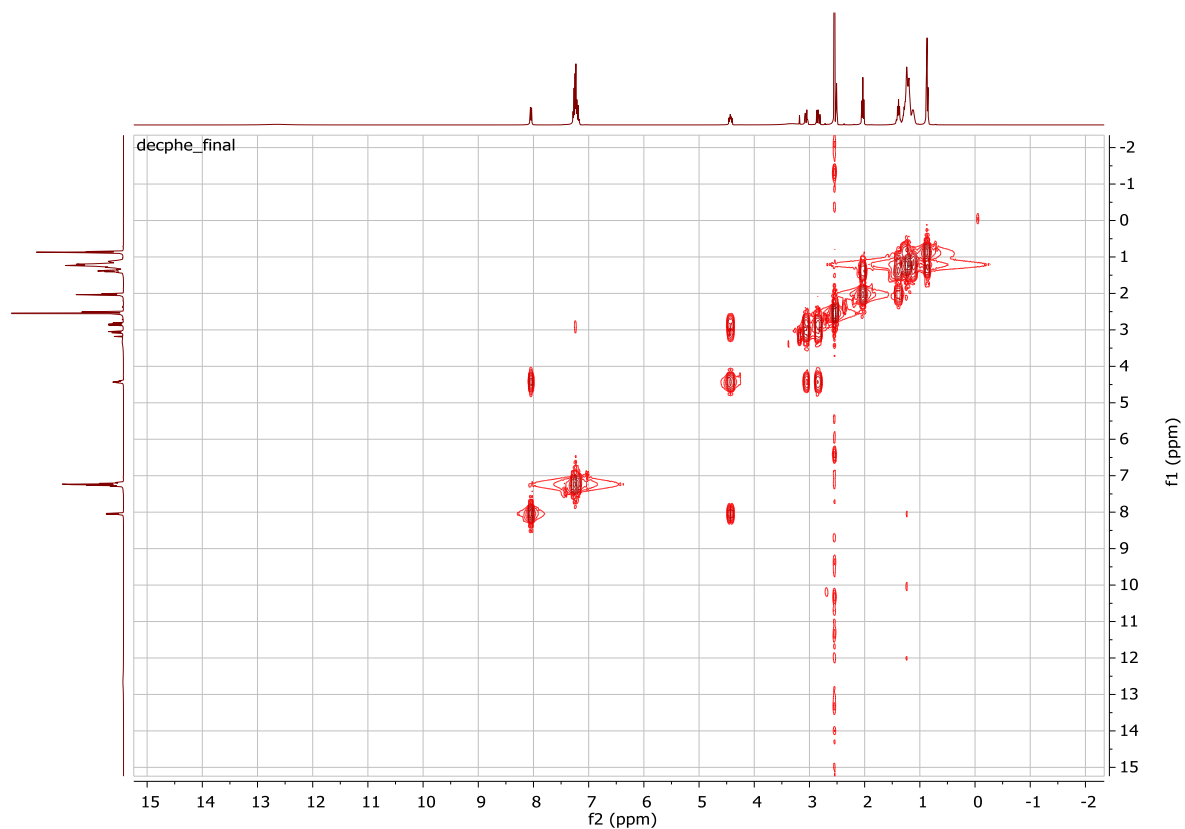

Figure S14. NMR spectra of synthetic compound 4 (DMSO, 600 MHz)

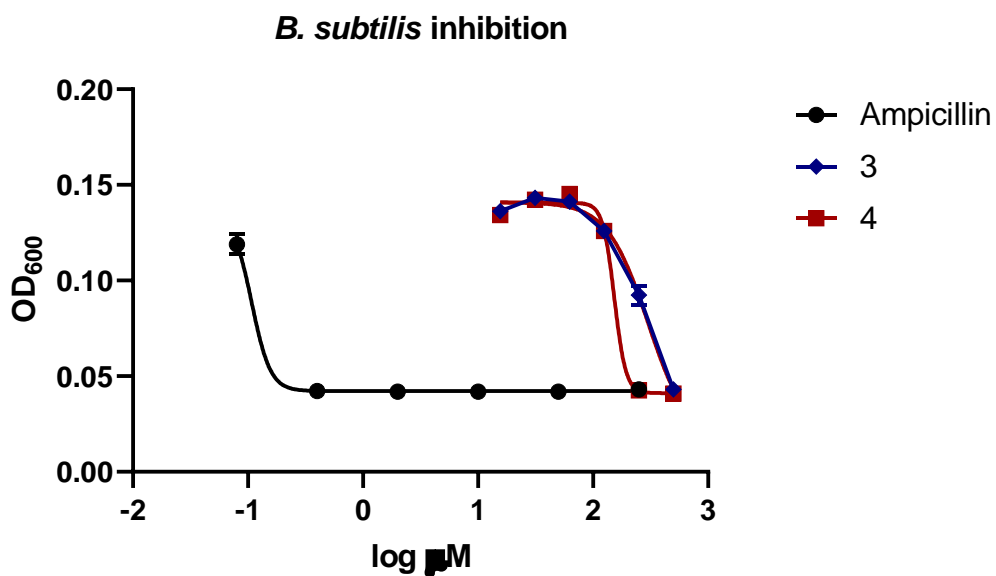

Figure S15. Antibacterial assay of compounds 3 and 4 against *Bacillus subtilis*. IC<sub>50</sub> was calculated as 301.2  $\mu\text{M}$  and 153  $\mu\text{M}$  for 3 and 4, respectively, through a variable slope (four parameters) fitting on GraphPad Prism.

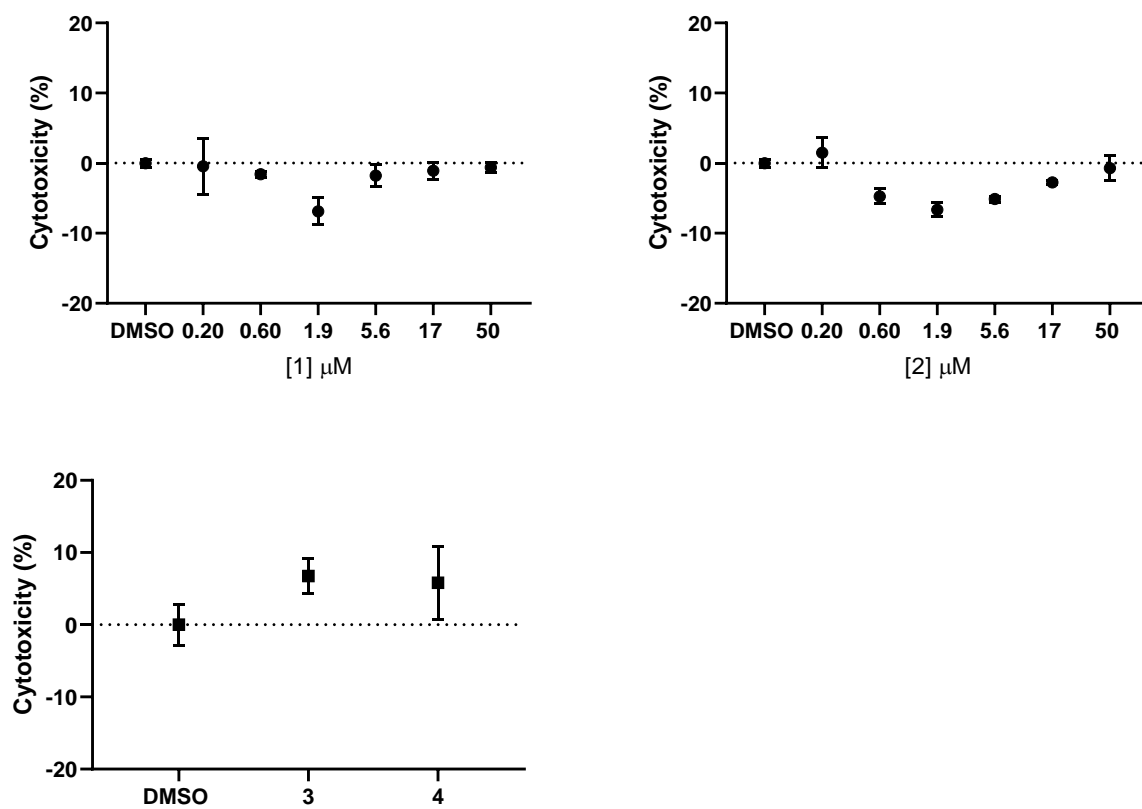

**Figure S16.** Cytotoxicity (LDH readout) measurements of compounds **1** and **2** at varying concentrations, and of compounds **3** and **4** at fixed concentration of 30  $\mu\text{M}$ .
